# Supplementary material for: Concurrent prescriptions for opioids and benzodiazepines and risk of opioid overdose: protocol for a retrospective cohort study using linked administrative data
Source: PubMed Central journal article supplement — BMJ Open. 2021 Feb 18;11(2):e042299. doi: 10.1136/bmjopen-2020-042299 (PMC7896580; doi:10.1136/bmjopen-2020-042299), 2021-02-18
Supplement: bmjopen-2020-042299.draft_revisions.pdf [file bmjopen-2020-042299.draft_revisions.pdf]

# BMJ Open

BMJ Open is committed to open peer review. As part of this commitment we make the peer review history of every article we publish publicly available.

When an article is published we post the peer reviewers' comments and the authors' responses online. We also post the versions of the paper that were used during peer review. These are the versions that the peer review comments apply to.

The versions of the paper that follow are the versions that were submitted during the peer review process. They are not the versions of record or the final published versions. They should not be cited or distributed as the published version of this manuscript.

BMJ Open is an open access journal and the full, final, typeset and author-corrected version of record of the manuscript is available on our site with no access controls, subscription charges or pay-per-view fees (<http://bmjopen.bmj.com>).

If you have any questions on BMJ Open's open peer review process please email [info.bmjopen@bmj.com](mailto:info.bmjopen@bmj.com)

# BMJ Open

## Concurrent prescriptions for opioids and benzodiazepines and risk of opioid overdose: protocol for a retrospective cohort study using linked administrative data

|                               |                                                                                                                                                                                                                                                                                                                                                                                                                                                                                                                                                                                                                                                                                                                                                    |
|-------------------------------|----------------------------------------------------------------------------------------------------------------------------------------------------------------------------------------------------------------------------------------------------------------------------------------------------------------------------------------------------------------------------------------------------------------------------------------------------------------------------------------------------------------------------------------------------------------------------------------------------------------------------------------------------------------------------------------------------------------------------------------------------|
| Journal:                      | <i>BMJ Open</i>                                                                                                                                                                                                                                                                                                                                                                                                                                                                                                                                                                                                                                                                                                                                    |
| Manuscript ID                 | bmjopen-2020-042299                                                                                                                                                                                                                                                                                                                                                                                                                                                                                                                                                                                                                                                                                                                                |
| Article Type:                 | Protocol                                                                                                                                                                                                                                                                                                                                                                                                                                                                                                                                                                                                                                                                                                                                           |
| Date Submitted by the Author: | 01-Jul-2020                                                                                                                                                                                                                                                                                                                                                                                                                                                                                                                                                                                                                                                                                                                                        |
| Complete List of Authors:     | Liu, Erin; McGill University, Department of Epidemiology, Biostatistics and Occupational Health; McGill University, McGill Clinical and Health Informatics<br>Tamblyn, Robyn; McGill University, Departments of Medicine and of Epidemiology, Biostatistics and Occupational Health; McGill University, McGill Clinical and Health Informatics<br>Filion, Kristian; McGill University, Departments of Medicine and of Epidemiology, Biostatistics and Occupational Health; Jewish General Hospital, Centre for Clinical Epidemiology, Lady Davis Institute<br>Buckeridge, David; McGill University, Departments of Medicine and of Epidemiology, Biostatistics, and Occupational Health; McGill University, McGill Clinical and Health Informatics |
| Keywords:                     | EPIDEMIOLOGY, Adverse events < THERAPEUTICS, PUBLIC HEALTH                                                                                                                                                                                                                                                                                                                                                                                                                                                                                                                                                                                                                                                                                         |
|                               |                                                                                                                                                                                                                                                                                                                                                                                                                                                                                                                                                                                                                                                                                                                                                    |

SCHOLARONE™  
Manuscripts

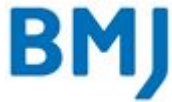

I, the Submitting Author has the right to grant and does grant on behalf of all authors of the Work (as defined in the below author licence), an exclusive licence and/or a non-exclusive licence for contributions from authors who are: i) UK Crown employees; ii) where BMJ has agreed a CC-BY licence shall apply, and/or iii) in accordance with the terms applicable for US Federal Government officers or employees acting as part of their official duties; on a worldwide, perpetual, irrevocable, royalty-free basis to BMJ Publishing Group Ltd ("BMJ") its licensees and where the relevant Journal is co-owned by BMJ to the co-owners of the Journal, to publish the Work in this journal and any other BMJ products and to exploit all rights, as set out in our [licence](#).

The Submitting Author accepts and understands that any supply made under these terms is made by BMJ to the Submitting Author unless you are acting as an employee on behalf of your employer or a postgraduate student of an affiliated institution which is paying any applicable article publishing charge ("APC") for Open Access articles. Where the Submitting Author wishes to make the Work available on an Open Access basis (and intends to pay the relevant APC), the terms of reuse of such Open Access shall be governed by a Creative Commons licence – details of these licences and which [Creative Commons](#) licence will apply to this Work are set out in our licence referred to above.

Other than as permitted in any relevant BMJ Author's Self Archiving Policies, I confirm this Work has not been accepted for publication elsewhere, is not being considered for publication elsewhere and does not duplicate material already published. I confirm all authors consent to publication of this Work and authorise the granting of this licence.

1  
2  
3  
4  
5  
6  
7 **Concurrent prescriptions for opioids and benzodiazepines and risk of opioid overdose:**  
8 **protocol for a retrospective cohort study using linked administrative data**  
9

10  
11  
12  
13 Erin Y. Liu<sup>1,2</sup>, Robyn Tamblyn<sup>1,2,4</sup>, Kristian B. Filion<sup>1,3,4</sup>, David L. Buckeridge<sup>1,2,4</sup>  
14  
15

16  
17  
18 Author Affiliations:  
19

20 1. Department of Epidemiology, Biostatistics and Occupational Health, McGill University,  
21 Montréal, Québec Canada  
22

23 2. McGill Clinical and Health Informatics, McGill University, Montréal, Québec, Canada  
24

25 3. Center for Clinical Epidemiology, Lady Davis Institute, Jewish General Hospital, Montréal,  
26 Québec, Canada  
27

28 4. Department of Medicine, McGill University, Montréal, Québec, Canada  
29  
30  
31  
32  
33  
34  
35  
36  
37  
38

39 Corresponding Author

40 Erin Liu  
41 Erin.y.liu@mail.mcgill.ca

42 1140 Pine Avenue West  
43 Montréal, Quebec, H3A 1A3  
44 Canada  
45  
46  
47

48 Abstract word count: 286

49 Manuscript word count: 3,252

50 References: 50

51 Tables: 1

52 Figures: 1

53 Appendix: 1

54 Keywords: opioids, benzodiazepines, concomitant/concurrent drug use, pharmacoepidemiology  
55  
56  
57  
58  
59  
60

## ABSTRACT

**Introduction:** Opioid overdoses have increased substantially over the last 20 years, with over 700,000 deaths in North America. While opioid prescribing has been a target of research, benzodiazepine and opioid co-intoxication has emerged as a potential risk factor. Our aim is to assess the risk of opioid overdose associated with concurrent use of opioids and benzodiazepines relative to opioids alone.

**Methods and analysis:** A retrospective cohort study will be conducted using medical claims data from adult residents of Montréal, Canada. We will create a cohort of new users of opioids (i.e., no opioid dispensations in prior year) in 2000-2014 from people with at least two years of continuous health insurance. Those with any diagnosis or hospitalization for cancer or palliative care in the two-years before their first opioid dispensation will be excluded. On each person-day of follow-up, exposure status will be classified into one of four mutually-exclusive categories: i) opioid-only, ii) benzodiazepine-only, iii) both opioid and benzodiazepine (concurrent use), or iv) neither. Opioid overdose will be measured using diagnostic codes documented in the hospital discharge abstract database, physician billing claims from emergency department visits, and death records. Using a marginal structural Cox proportional hazards model, we will compare the hazard of overdose during intervals of concurrent opioid and benzodiazepine use to intervals of opioid use alone, adjusted for socio-demographics, medical and psychiatric comorbidities, and substance use disorders.

**Ethics and dissemination:** This study is approved by the McGill Faculty of Medicine Institutional Review Board and the *Commission d'accès à l'information* (Québec privacy commission). Results will be relevant to clinicians, policymakers, and other researchers interested in co-prescribing practices of opioids and benzodiazepines. Study findings will be disseminated at relevant conferences and published in biomedical and epidemiological peer-reviewed journals.

## ARTICLE SUMMARY

### Strengths and Limitations of this study

- Our study will contribute evidence to an important public health question. Given the high prescribing rates of opioids and benzodiazepines, any risk of overdose from their concurrent use would have a large impact at a population level. It is thus crucial that we assess the association between concurrent drug use and risk of overdose.
- A strength in our study is the use of rigorous design features that were chosen to reduce bias. Restricting our cohort to new opioid users instead of prevalent users reduces the chance for selection bias because prevalent opioid users will be more tolerant of the medication. We will also use a validated outcome definition, and by modelling exposure as time-varying, we will reduce misclassification bias.
- The use of causal inference methods in our main analysis is both scientifically rigorous and novel for this area of research. By employing a marginal structural Cox proportional hazards model, we can control both time-fixed and time-varying confounders, reducing confounding bias. Conducting observational studies with varied statistical techniques in diverse populations will strengthen the evidence base regarding this issue.
- This will be the first study outside the USA to investigate this research question. Our study in a Canadian sample can inform whether previous results are robust across different healthcare systems, types of prescribing behaviour, and drug insurance policies.
- A potential limitation is that our results may not be generalizable to all opioid users, as we are restricted to individuals insured through the public drug plan. The drug plan is limited to all persons 65 years or older, those on social assistance, and those without employer-based access to drug insurance. However, given that we are measuring a biological drug effect and population-level variation in drug metabolism is unlikely to differ substantially, our results should be generalizable to most patients prescribed these medications.

## INTRODUCTION

Morbidity and mortality attributable to opioid use has increased sharply in North America over the last 20 years. In the USA, deaths from opioid overdose increased threefold from 1999 to 2015<sup>1</sup>, while in Canada, hospitalizations rose by 53% from 2007 to 2017<sup>2</sup>, and 12,800 people have died from opioid overdose from January 2016 to March 2019<sup>3</sup>. Since the number of opioid overdoses remains high and they affect younger age groups disproportionately, these alarming trends demand effective and immediate public health actions.

Substantial research activity has focused on the role of prescription opioids in these overdoses and deaths.<sup>4-7</sup> Increasingly though, the co-prescribing of opioids and benzodiazepines and their potential role in causing overdose is receiving attention.<sup>8-11</sup> Up to 30% of prescription opioid overdose deaths involved benzodiazepines<sup>12</sup> and this prevalence has increased over time, from 16.8% in 2002-03 to 27.9% in 2014-15.<sup>13</sup> In comparison, the prevalence of other concurrent prescriptions such as antidepressants has remained constant. During this period, outpatient co-prescribing rates for these two drugs has increased, from 0.5% (95% CI 0.3 to 0.7) of visits to 2.0% (95% CI 1.4 to 2.7)<sup>14</sup> and amongst all opioid users, the proportion with a concurrent benzodiazepine prescription rose from 7% in 2002 to 10% in 2014<sup>15</sup>. In this context, the extent of the role of benzodiazepines in the opioid overdose epidemic demands further research.

Benzodiazepines are a class of anticonvulsant/anxiolytic medications used to treat anxiety, depression, panic disorders, insomnia, seizure disorders, alcohol dependence, and musculoskeletal pain.<sup>16</sup> When consumed alone, benzodiazepines do not cause respiratory depression, the main consequence of drug overdose. But animal studies have shown that the risk of respiratory depression is elevated when benzodiazepines are taken concurrently with opioids.<sup>17</sup> This interaction is due to the presence of receptors for both opioids (mu and delta) and benzodiazepines (GABA) in the brain region responsible for respiratory control.<sup>18</sup> Since benzodiazepines act on the inhibitory pathway for respiration and opioids inhibit the excitatory receptors, the activation of both pathways can reduce the respiratory drive more than the activation of either pathway alone. Whether this reduction is a consequence of an additive effect of both drugs inhibiting the respiratory system or an amplification of benzodiazepines on the effects of opioids is unknown. Nevertheless, the biological mechanism suggests greater harm from their combined use, and there is a need to understand if these effects are sufficient to cause respiratory depression at therapeutic doses.

To date, three epidemiologic studies conducted in population-based samples of adults have examined the risk of overdose associated with concurrent use of opioids and benzodiazepines. All of these retrospective studies were based in United States and used health insurance claims data. They reported effects ranging from hazard ratio (HR)=1.2 (95% CI 1.16 to 1.34; Cho et al)<sup>19</sup>, odds ratio (OR)=2.14 (95% CI 2.05 to 2.24; Sun et al)<sup>20</sup>, to HR=5.05 (95% CI 3.68 to 6.93; Hernandez et al)<sup>21</sup> when comparing concurrent opioid and benzodiazepine use to opioid use alone. However, potential methodological limitations make these results difficult to interpret. In Hernandez et al, the exclusion of cohort members based on non-benzodiazepine sedatives use after cohort entry<sup>21</sup> could induce selection bias, with an unknown effect on the point estimate if concurrent users are more, or less, likely to be dispensed these medications. A potential source of selection bias in Sun et al is restriction to prevalent opioid users<sup>20</sup> since this would limit the sample to those who tolerated their opioid medication long enough to continue its use. Bias from exposure misclassification is also a concern. In the retrospective cohort study conducted by Hernandez et al, comparing concurrent use in the 1-90 days before overdose to

1  
2  
3 opioid-only use in the 1 day before means concurrent users had more opportunity (up to 90 days)  
4 for opioid exposure. Longer opportunity for opioid use means concurrent users are more likely to  
5 be chronic opioid users,<sup>15,22</sup> which independently increases the risk for overdose. The resultant  
6 effect would be an over-estimation of the association. In Sun et al, misclassification bias from  
7 inclusion of person-years of non-opioid use in the reference group could have also overestimated  
8 the association. Periods of non-opioid use are less likely to lead to opioid overdose, which would  
9 artificially underestimate the rate of overdose in the reference group. Immortal time bias<sup>23</sup> due to  
10 misclassification of person-time could have manifested in the retrospective cohort study  
11 conducted by Cho et al<sup>19</sup>. In their main analysis, use of a time-fixed exposure means patients  
12 who initiated opioids and later added a benzodiazepine to their opioid regimen would have their  
13 opioid-only (and, by definition, event-free) person-time misclassified as concurrent drug use.  
14 This misclassification would bias the estimate downward, under-estimating the risk.  
15

16  
17 In summary, the current evidence base could be affected by important bias. As such,  
18 there remains uncertainty about the magnitude of the risk of overdose due to the concurrent use  
19 of opioids and benzodiazepines. To reduce this uncertainty, we propose a retrospective cohort  
20 study using population-based data sources.  
21

22 Prescription opioid use has more than doubled in North America from 2001 to 2013, and  
23 combined with Europe and Oceania, these three continents account for 95.7% of worldwide  
24 use.<sup>24</sup> Benzodiazepine use is also high in these regions, with the USA reporting 5.2% of adults  
25 filling a prescription in 2008<sup>25</sup>, 4.9% amongst those 45 years and older in Canada in 2002<sup>26</sup>,  
26 17.7% prevalence of use in France in 2012<sup>27</sup> and 2.4% of Australians from 2002 to 2007<sup>28</sup>.  
27 Evidently, the use of prescription opioids and benzodiazepines is highly prevalent in many  
28 countries. An accurate estimate of the risk of overdose associated with their concurrent use is  
29 important for setting public health policy in this area.  
30

## 31 32 **METHODS AND ANALYSIS**

### 33 Data source

34 This study will use anonymized population-based administrative data from Montréal,  
35 Québec to define our cohort and measure all study variables. The source population consists of  
36 1.4 million people representing a 25% random sample of health-insured Montréal residents  
37 sampled from January 1, 1998 to December 31, 2014. For each individual, data on their  
38 physician services and community pharmacy drug dispensations comes from the *Régie de*  
39 *l'assurance maladie du Québec* (RAMQ), the provincial health authority that reimburses all  
40 publicly-insured medical and pharmacy services. Data on hospitalizations is provided by the  
41 *Ministère de la santé et des services sociaux* (MSSS), and mortality data comes from the *Institut*  
42 *de la statistique du Québec* (ISQ). As such, we have linked information on each person's  
43 demographics, inpatient and outpatient medical services, hospitalizations, emergency department  
44 (ED) visits, and the date and causes of death from the time they were sampled until the time that  
45 an individual loses health insurance through death or emigration from province. Half of residents  
46 are also insured for prescription drugs through the RAMQ if they are welfare recipients, aged 65  
47 years or older, or lack other drug insurance coverage (e.g., through their employer). Thus, data  
48 on dispensed drugs in the community (including the date, chemical name, dose, and duration),  
49 the prescribing physician, and dispensing pharmacist are available for approximately 50% of  
50 Montréal residents. The data sources have been validated previously<sup>29</sup> and used extensively for  
51 research<sup>30-33</sup>.  
52  
53  
54  
55  
56  
57  
58  
59  
60



### Study population

New opioid users with RAMQ drug insurance will form our study population. These are drug-insured Montréal residents aged  $\geq 18$  who started using opioids between 2000 and 2014. We chose to include new users starting on January 1, 2000 to allow a two-year lookback period for exclusion criteria. A new opioid user will be defined as a person with no opioid dispensations for at least one year before their first opioid dispensation in this interval. A new user design was chosen to reduce the chance for selection bias, as prevalent drug users are limited to those that tolerated the drug well enough to continue its use.<sup>34</sup> The date of their first opioid dispensation will define the cohort entry date, and opioid users will be followed from this date until the occurrence of the outcome (defined below) or censoring due to i) death, ii) cancer diagnosis, iii) palliative care admission, iv) loss of drug or health insurance, or v) end of study period (December 31, 2014). Since patients with cancer and those undergoing palliative care will have a different risk-benefit ratio when using opioids, cohort members will be excluded if they have at least one cancer or palliative-care related diagnostic code in the two years prior to cohort entry. Patients whose first opioid dispensation is methadone or buprenorphine likely have a history of illicit opioid use, as these medications are indicated for an opioid use disorder. Given that we will be adjusting for history of opioid substance abuse, these patients will remain in the study.

### Outcome

An opioid overdose occurs when opioids, possibly together with other substances, cause sedation, leading to loss of consciousness and respiratory depression.<sup>35</sup> We chose to study events where the use of opioids alone or in combination with benzodiazepines induces respiratory depression severe enough to require medical attention. To identify these events, we will use *International Classification of Diseases* (ICD) codes for opioid poisoning (ICD-9 codes E8500-E8502, 96500-96509 and ICD-10 codes T400-T404, T4060, T4069 and X42) and acute effects of opioids (E9350-E9352 and Y450) (Table E1, Appendix I). The presence of any one of these codes in medical service claims, hospital discharge abstracts, or vital statistics data during follow-up will define an event, and follow-up will be censored on this date. We chose to use ICD codes related to opioid poisoning and acute effects of opioids because there are no codes specific to drug overdose. However, validation studies comparing opioid poisoning codes to physician chart review have found positive predictive values ranging from 70.0% to 84.6%<sup>36-38</sup>. As such, this outcome definition will provide a high specificity in capturing the mechanism of interest (e.g., respiratory depression caused by medication).

### Exposure

To ascertain each person's opioid and benzodiazepine status, we will calculate their average daily dose using information on the drug type (Table E2, Appendix I), the date the prescription was filled, the dose, quantity dispensed, and duration of the prescription. To account for different combinations of use and non-use, we will model our exposure using a time-varying approach. On each day of follow-up, exposure status will be classified into one of four mutually-exclusive categories: i) opioid-only, ii) benzodiazepine-only, iii) both opioid and benzodiazepine (concurrent use), or iv) neither (Figure 1). Since opioid overdose is an acute event, we will consider exposure status on the day before the event as the primary etiologic window of interest.

To ensure equivalency across opioid types, we will use published conversion factors to calculate each drug's oral morphine milligram equivalent (MME).<sup>2,39</sup> To calculate MME, we will use the standard method of multiplying the average daily dose by its conversion factor:

$$\text{Dosage per pill in mg} \times \frac{\text{\# of pills}}{\text{Duration of prescription in days}} \times \text{MME conversion factor}$$

To standardize benzodiazepine potencies, we will use the defined daily dose (DDD) methodology as recommended by the World Health Organization Collaborating Centre for Drug Statistics Methodology (WHOCC).<sup>40</sup> The DDD is the “the assumed average maintenance dose per day for a drug used for its main indication in adults” and is calculated as follows:

$$\frac{\text{Total \# pills}}{\text{Duration of prescription in days}} \times \frac{\text{Dosage per pill in mg}}{\text{WHO recommended daily dose in mg}}$$

Each drug's Anatomical Therapeutic Chemical (ATC) category and route of administration has its own recommended daily dose, and values will be obtained from the WHOCC website.

### Confounders

Confounding can occur in our study if we fail to adjust for factors that differ between opioid users and concurrent users, and these factors independently affect one's risk for overdose. Opioid users additionally prescribed a benzodiazepine are often older<sup>15,20,41</sup>, more likely to be women<sup>15,20,41,42</sup>, require social assistance<sup>14,21</sup>, be a chronic opioid user<sup>15</sup>, have more pain conditions<sup>41</sup>, use more potent opioids<sup>41,43</sup>, use other central nervous system medications<sup>19,42</sup>, and are more likely to have comorbidities<sup>19,20</sup>, mental health<sup>19,21,41,42</sup> and substance use disorders<sup>20,41,42</sup>. Concurrent users are also more likely to seek out multiple prescribers and pharmacies in a given time period<sup>21,43,44</sup>. Since these characteristics are also associated with overdose in studies on opioid prescribing patterns,<sup>45</sup> it is important that they are adjusted for in this study.

Across all statistical analyses, we will adjust for the following confounders (Table 1): demographic factors such as age, sex, drug insurance type and neighborhood income quintile, medical comorbidities such as history of myocardial infarction, dementia, and chronic pulmonary disease, mental health comorbidities such as diagnoses and prescriptions for anxiety, depression, and mood disorders, opioid use disorders, non-opioid substance abuse/misuse such as alcohol or nicotine dependence and measures of drug-seeking behaviour such as the number of distinct prescribers and pharmacies used in past 30 days. Receipt of concurrent muscle relaxants or Z-drugs will also be adjusted for since these medications can also depress the respiratory system.

Values of covariates will be measured in the baseline period (1-year before cohort entry), and every 30 days during follow-up. For age, sex, drug insurance type, neighborhood income quintile and history of opioid poisoning, the baseline values will remain fixed throughout follow-up. For medical comorbidities, mental health conditions, opioid use disorder, and substance use disorders, once a patient is diagnosed, we will assume these conditions persist. All other covariate values will be updated every 30 days during follow-up.

## Statistical analyses

### *Main analysis*

Time-varying confounding is a concern when both exposure and confounder values are likely to change over the study period and affect each other.<sup>46</sup> Given that opioids and benzodiazepines are often used intermittently, bias could occur if there are factors that both predict a change in benzodiazepine status (e.g., development of drug misuse disorders or mental health exacerbation) and independently increase the risk for overdose. The three previous epidemiological studies assessing concurrent use and risk of overdose measured confounders at baseline only.<sup>19–21</sup> This approach assumes, often implicitly, that comorbidities and drugs used at baseline remain the same throughout follow-up and that changes in comorbidities and concomitant drugs that occur during follow-up do not impact subsequent exposure to concurrent opioid and benzodiazepines. However, for studies with long follow-up periods and transient exposures, such as our study, this assumption will likely be violated.

To adjust for changes in confounder status without adjusting for variables on the causal pathway, we will employ a marginal structural Cox model with inverse probability of treatment weights (IPTW).<sup>47</sup> These models re-weight study participants based on their inverse probability of treatment, conditional on history of opioid and benzodiazepine use, and previous confounders. To construct these weights, we will first develop a multinomial logistic regression (exposure model) for the 4 exposure categories. Covariates used to generate the exposure model will include all time-varying confounders listed in Table 1. These weights will be re-estimated during study follow-up using updated covariate values from the past 30 days. For values that do not change, the previous value will be carried forward. Indicator variables will be used for all categorical covariates and continuous covariates will be tested for non-linear effects using Akaike Information Criterion (AIC) to determine the optimal form. Once we convert the log odds into predicted probabilities,  $P(A|W)$ , for each exposure category, we can calculate stabilized weights  $[P(A)/P(A|W)]$ , where  $P(A)$  is the observed probability exposed to the specific opioid/benzodiazepine category, and  $P(A|W)$  is the predicted probability estimated from the exposure model as this approach is more efficient than using un-stabilized weights, which are simply  $1/P(A|W)$ .<sup>47,48</sup> To check for positivity violations, we will assess the mean distribution of weights which should be close to 1, and the robustness of our results will be assessed after removing extreme weights (e.g. 99<sup>th</sup>, 95<sup>th</sup>, and 90<sup>th</sup> percentile values).

The final Cox proportional hazards regression model will estimate the hazard ratio for time to first overdose event, when comparing events during concurrent opioid and benzodiazepine person-time to opioid-only person time, adjusted for baseline confounders, and weighted according to each person's vector of IPTWs. We will use bootstrapping to construct 95% confidence intervals.

### *Secondary analyses*

To identify patient characteristics that may modify the opioid and benzodiazepine association with overdose, we will undertake the following secondary analyses. We will stratify the primary analyses by sex (males vs female), age ( $\geq 76$  vs 65 to 75 years among everyone on the 65+ drug insurance plan), social deprivation (drug insurance for welfare recipients vs all other), presence of an opioid use disorder or substance use disorder (ever/never), presence of a mental health condition (ever/never), and number and type of distinct opioid prescribers (e.g., surgeon, dentist or family physician). To assess potential differential effects by drug characteristics, we will also stratify analyses by cumulative days, and standardized dose of

1  
2  
3 opioid and benzodiazepine supply in the 7 and 30 days prior to overdose. Individuals who have a  
4 greater supply of or more potent forms of medication will have more opportunity to over-use.  
5 We intend these analyses to be hypothesis generating for future researchers to identify high-risk  
6 patient groups.  
7

### 8 9 *Sensitivity analyses*

10 To account for the biological half-lives<sup>49</sup> of opioids and benzodiazepines, and the fact  
11 that many patients may take their medications on an ‘as needed’ (or “PRN”) basis, we will  
12 introduce a grace period into our exposure assessment, where an additional 7 and 30 days of drug  
13 duration will be added to the end of each prescription. This is to account for situations where  
14 some patients may dispense their drug but keep it in their medicine cabinets until it is required.  
15 Since chronic opioid users have more medication in supply, this also increases their chance for  
16 overdose if they ingest more than the recommended dose at once. Although opioid and  
17 benzodiazepine-induced overdose is an acute effect, we will assess the 30-day period before the  
18 event date as a secondary etiological window of interest. To address the possibility that prevalent  
19 benzodiazepine users may be less susceptible to respiratory depression due to tolerance, we will  
20 perform another sensitivity analysis restricting our cohort to those with no use of  
21 benzodiazepines in the 1 year before cohort entry. Finally, given the challenges of attributing  
22 causality in drug poisoning, we will repeat our primary analyses using the broader definition of  
23 any drug poisoning to account for outcome measurement error.  
24  
25  
26

### 27 *Patient and Public Involvement*

28 This research was done without patient involvement. Patients were not invited to comment on  
29 the study design and were not consulted to develop patient relevant outcomes or interpret the  
30 results. Patients were not invited to contribute to the writing or editing of this document for  
31 readability or accuracy.  
32  
33

## 34 **ETHICS AND DISSEMINATION**

35 This study is approved by the McGill Faculty of Medicine Institutional Review Board,  
36 and the *Commission d'accès à l'information* (Québec privacy commission). Since we will be  
37 using pseudo-anonymized data, no consent is required.  
38

39 Our findings will be important to researchers, public health, and medical communities in  
40 Canada and abroad, and this will be reflected in our dissemination plan. We plan to first present  
41 our findings at pharmacoepidemiology (e.g. the International Conference on  
42 Pharmacoepidemiology & Therapeutic Risk Management) and public health/health services  
43 conferences (e.g. the Canadian Association for Health Services and Policy Research and Public  
44 Health). We hope to elicit feedback from our scientific and clinical colleagues at these venues.  
45 As our methods are novel and other epidemiologists may benefit from learning about our  
46 experience applying these methods, we will also be submitting abstracts to the Society for  
47 Epidemiology's Annual Meeting and the Canadian Society for Epidemiology and Biostatistics  
48 conference. Our partners at the National Institute of Public Health of Québec (INSPQ) and  
49 Canadian Institutes of Health Research (CIHR)'s Drug Safety and Effectiveness Network  
50 (DSEN) will be important knowledge users. We anticipate our work will inform decisions  
51 around implementing prescription monitoring programs and guidelines on prescribing of opioids  
52 and benzodiazepines. We will reach out to our public health partners to present this work in their  
53 organizational seminars.  
54  
55  
56  
57  
58  
59

1  
2  
3  
4 After integrating feedback from conference peers, we will submit our manuscript to peer-  
5 reviewed biomedical journals (e.g. BMJ, AJPM) as primary care physicians are responsible for  
6 the majority of opioid and benzodiazepine prescriptions. All publications will be reported in  
7 accordance with the REporting of studies Conducted using Observational Routinely collected  
8 health Data specific to pharmacoepidemiological research (RECORD-PE).<sup>50</sup>  
9

### 10 **AUTHOR CONTRIBUTIONS**

11 This study was conceived by EYL and all authors contributed to the design, analysis and  
12 interpretation of the data. EYL drafted the manuscript and DLB, RT, KBF revised it critically for  
13 important intellectual content. All authors gave final approval of the version to be published and  
14 EYL will be the guarantor of the work.  
15

16  
17 **ACKNOWLEDGEMENTS** The authors are grateful for the comments and recommendations  
18 provided by Dr. Ari Nandi, Dr. Robert Platt and Dr. Michal Abrahamowicz during their review  
19 of an earlier draft of this protocol.  
20

### 21 **FUNDING STATEMENT**

22 EYL is supported by the McGill R.H Tomlinson Fellowship, the CIHR Frederick Banting and  
23 Charles Best Doctoral Award, and the CIHR Drug Safety and Effectiveness Cross-Disciplinary  
24 Training Program (DSECT). KBF is supported by a salary support award from the *Fonds de*  
25 *recherche du Québec – santé* (FRQS; Quebec Foundation for Health Research) and a William  
26 Dawson Scholar award from McGill University. DLB is supported by a Canada Research Chair  
27 in Health Informatics and Data Science. RT is supported by a Canadian Institutes of Health  
28 Research (CIHR) Operating Grant.  
29  
30

### 31 **DATA STATEMENT**

32 The data sharing agreements governing use of our data restricts access to members of the  
33 research team only. However, technical information used for this study (e.g. drug and disease  
34 codes) is available and will be provided in an appendix. DOI: [include DOI for appendix here].  
35  
36

### 37 **COMPETING INTERESTS STATEMENT**

38 The authors have no conflicts of interest relevant to this manuscript to disclose.  
39  
40

### 41 **EXCLUSIVE LICENCE**

42 I, the Submitting Author has the right to grant and does grant on behalf of all authors of the  
43 Work (as defined in the below author licence), an exclusive licence and/or a non-exclusive  
44 licence for contributions from authors who are: i) UK Crown employees; ii) where BMJ has  
45 agreed a CC-BY licence shall apply, and/or iii) in accordance with the terms applicable for US  
46 Federal Government officers or employees acting as part of their official duties; on a worldwide,  
47 perpetual, irrevocable, royalty-free basis to BMJ Publishing Group Ltd (“BMJ”) its licensees and  
48 where the relevant Journal is co-owned by BMJ to the co-owners of the Journal, to publish the  
49 Work in BMJ Open and any other BMJ products and to exploit all rights, as set out in our  
50 licence.  
51  
52

53  
54 The Submitting Author accepts and understands that any supply made under these terms is made  
55 by BMJ to the Submitting Author unless you are acting as an employee on behalf of your  
56  
57  
58  
59  
60

1  
2  
3 employer or a postgraduate student of an affiliated institution which is paying any applicable  
4 article publishing charge (“APC”) for Open Access articles. Where the Submitting Author  
5 wishes to make the Work available on an Open Access basis (and intends to pay the relevant  
6 APC), the terms of reuse of such Open Access shall be governed by a Creative Commons licence  
7 – details of these licences and which Creative Commons licence will apply to this Work are set  
8 out in our licence referred to above.  
9  
10  
11  
12  
13  
14  
15  
16  
17  
18  
19  
20  
21  
22  
23  
24  
25  
26  
27  
28  
29  
30  
31  
32  
33  
34  
35  
36  
37  
38  
39  
40  
41  
42  
43  
44  
45  
46  
47  
48  
49  
50  
51  
52  
53  
54  
55  
56  
57  
58  
59  
60

## REFERENCES

1. Centers for Disease Control and Prevention and U.S. Department of Health and Human Services. *Annual Surveillance Report of Drug-Related Risks and Outcomes — United States. Surveillance Special Report. 2017.*; 2018. <https://www.cdc.gov/%0Adrugoverdose/pdf/pubs/2018-%0Acdc-drug-surveillance-report.pdf>.
2. Canadian Institute for Health Information. *Opioid-Related Harms in Canada*. Ottawa, Ontario; 2017. <https://www.longwoods.com/articles/images/opioid-harms-chart-book-en.pdf>. Accessed April 7, 2018.
3. Public Health Agency of Canada. National report: Apparent opioid-related deaths in Canada (January 2016 to March 2019).
4. Dasgupta N, Funk MJ, Proescholdbell S, Hirsch A, Ribisl KM, Marshall S. Cohort Study of the Impact of High-dose Opioid Analgesics on Overdose Mortality. *Pain Med*. 2015;17(1):n/a-n/a. doi:10.1111/pme.12907
5. Dunn KM, Saunders KW, Rutter CM, et al. Opioid Prescriptions for Chronic Pain and Overdose. *Ann Intern Med*. 2010;152(2):85. doi:10.7326/0003-4819-152-2-201001190-00006
6. Spooner L, Fernandes K, Martins D, et al. High-Dose Opioid Prescribing and Opioid-Related Hospitalization: A Population-Based Study. Schanzer DL, ed. *PLoS One*. 2016;11(12):e0167479. doi:10.1371/journal.pone.0167479
7. Bohnert ASB, Valenstein M, Bair MJ, et al. Association Between Opioid Prescribing Patterns and Opioid Overdose-Related Deaths. *JAMA*. 2011;305(13):1315. doi:10.1001/jama.2011.370
8. Karaca-Mandic P, Meara E, Morden NE. The growing problem of co-treatment with opioids and benzodiazepines. *BMJ*. 2017;356:j1224. doi:10.1136/bmj.j1224
9. Lembke A, Papac J, Humphreys K. Our Other Prescription Drug Problem. *N Engl J Med*. 2018;378(8):693-695. doi:10.1056/NEJMp1715050
10. Benzos might be a “hidden element” of the US’ overdose epidemic - CNN. <https://www.cnn.com/2020/01/20/health/benzodiazepines-prescriptions-study/index.html>. Accessed January 23, 2020.
11. Limandri BJ. Benzodiazepine Use: The Underbelly of the Opioid Epidemic. *J Psychosoc Nurs Ment Health Serv*. 2018;56(6):11-15. doi:10.3928/02793695-20180521-03
12. Jones CM, Mack KA, Paulozzi LJ. Pharmaceutical Overdose Deaths, United States, 2010. *JAMA*. 2013;309(7):657. doi:10.1001/jama.2013.272
13. Kandel DB, Hu M-C, Griesler P, Wall M. Increases from 2002 to 2015 in prescription opioid overdose deaths in combination with other substances. *Drug Alcohol Depend*. 2017;178:501-511. <http://www.ncbi.nlm.nih.gov/pubmed/28719884>. Accessed August 9, 2018.
14. Agarwal SD, Landon BE. Patterns in Outpatient Benzodiazepine Prescribing in the United States. *JAMA Netw Open*. 2019;2(1):e187399. doi:10.1001/jamanetworkopen.2018.7399
15. Hwang CS, Kang EM, Kornegay CJ, Staffa JA, Jones CM, McAninch JK. Trends in the Concomitant Prescribing of Opioids and Benzodiazepines, 2002–2014. *Am J Prev Med*. 2016;51(2):151-160. doi:10.1016/J.AMEPRE.2016.02.014
16. Koch-Weser J, Greenblatt DJ, Shader RI, Abernethy DR. Current Status of Benzodiazepines. *N Engl J Med*. 1983;309(7):410-416. doi:10.1056/NEJM198308183090705

17. Jones JD, Mogali S, Comer SD. Polydrug abuse: A review of opioid and benzodiazepine combination use. *Drug Alcohol Depend.* 2012;125(1-2):8-18. doi:10.1016/J.DRUGALCDEP.2012.07.004
18. White JM, Irvine RJ. Mechanisms of fatal opioid overdose. *Addiction.* 1999;94(7):961-972. <http://www.ncbi.nlm.nih.gov/pubmed/10707430>. Accessed August 14, 2018.
19. Cho J, Spence MM, Niu F, Hui RL, Gray P, Steinberg S. Risk of Overdose with Exposure to Prescription Opioids, Benzodiazepines, and Non-benzodiazepine Sedative-Hypnotics in Adults: a Retrospective Cohort Study. *J Gen Intern Med.* 2020. doi:10.1007/s11606-019-05545-y
20. Sun EC, Dixit A, Humphreys K, Darnall BD, Baker LC, Mackey S. Association between concurrent use of prescription opioids and benzodiazepines and overdose: retrospective analysis. *BMJ.* 2017;356:j760. doi:10.1136/bmj.j760
21. Hernandez I, He M, Brooks MM, Zhang Y. Exposure-Response Association Between Concurrent Opioid and Benzodiazepine Use and Risk of Opioid-Related Overdose in Medicare Part D Beneficiaries. *JAMA Netw Open.* 2018;1(2):e180919. doi:10.1001/jamanetworkopen.2018.0919
22. Sharma V, Weir D, Samanani S, et al. Characterisation of concurrent use of prescription opioids and benzodiazepine/Z-drugs in Alberta, Canada: A population-based study. *BMJ Open.* 2019;9(9). doi:10.1136/bmjopen-2019-030858
23. Suissa S. Immortal Time Bias in Pharmacoepidemiology. *Am J Epidemiol.* 2008;167(4):492-499. doi:10.1093/aje/kwm324
24. Berterame S, Erthal J, Thomas J, et al. Use of and barriers to access to opioid analgesics: A worldwide, regional, and national study. *Lancet.* 2016;387(10028):1644-1656. doi:10.1016/S0140-6736(16)00161-6
25. Olfson M, King M, Schoenbaum M. Benzodiazepine use in the United States. *JAMA Psychiatry.* 2015;72(2):136-142. doi:10.1001/jamapsychiatry.2014.1763
26. Beck CA, Williams JVA, Wang JL, et al. Psychotropic medication use in Canada. *Can J Psychiatry.* 2005;50(10):605-613. doi:10.1177/070674370505001006
27. (ANSM) TNA for the S of M and HP. *Etat Des Lieux de La Consommation Des Benzodiazépines En France.*; 2012. <https://ansm.sante.fr/S-informer/Points-d-information-Points-d-information/Etat-des-lieux-en-2013-de-la-consommation-des-benzodiazepines-en-France-Point-d-Information>. Accessed June 12, 2020.
28. Hollingworth SA, Siskind DJ. Anxiolytic, hypnotic and sedative medication use in Australia. *Pharmacoepidemiol Drug Saf.* 2010;19(3):280-288. doi:10.1002/pds.1899
29. Tamblyn R, Lavoie G, Petrella L, Monette J. The use of prescription claims databases in pharmacoepidemiological research: The accuracy and comprehensiveness of the prescription claims database in Québec. *J Clin Epidemiol.* 1995;48(8):999-1009. doi:10.1016/0895-4356(94)00234-H
30. Verma A, Rochefort C, Powell G, Buckeridge D. Hospital readmissions and the day of the week. *J Health Serv Res Policy.* 2018;23(1):21-27. doi:10.1177/1355819617750185
31. Doll MK, Quach C, Buckeridge DL. Evaluation of the Impact of a Rotavirus Vaccine Program on Pediatric Acute Gastroenteritis Hospitalizations: Estimating the Overall Effect Attributable to the Program as a Whole, and as a Per-Unit Change in Rotavirus Vaccine Coverage. *Am J Epidemiol.* May 2018. doi:10.1093/aje/kwy097
32. Sylvestre M-P, Abrahamowicz M, Čapek R, Tamblyn R. Assessing the cumulative effects of exposure to selected benzodiazepines on the risk of fall-related injuries in the elderly.



- 1  
2  
3  
4  
5  
6  
7  
8  
9  
10  
11  
12  
13  
14  
15  
16  
17  
18  
19  
20  
21  
22  
23  
24  
25  
26  
27  
28  
29  
30  
31  
32  
33  
34  
35  
36  
37  
38  
39  
40  
41  
42  
43  
44  
45  
46  
47  
48  
49  
50  
51  
52  
53  
54  
55  
56  
57  
58  
59  
60
- Int Psychogeriatrics*. 2012;24(04):577-586. doi:10.1017/S1041610211002031
33. Bernatsky S, Joseph L, Pineau C, Tamblyn R, Feldman D, Clarke A. A population-based assessment of systemic lupus erythematosus incidence and prevalence--results and implications of using administrative data for epidemiological studies. *Rheumatology (Oxford)*. 2007;46(12):1814-1818. doi:10.1093/rheumatology/kem233
34. Danaei G, Tavakkoli M, Hernán MA. Bias in observational studies of prevalent users: Lessons for comparative effectiveness research from a meta-analysis of statins. *Am J Epidemiol*. 2012;175(4):250-262. doi:10.1093/aje/kwr301
35. World Health Organization. WHO | Information sheet on opioid overdose. *WHO*. 2018. [http://www.who.int/substance\\_abuse/information-sheet/en/](http://www.who.int/substance_abuse/information-sheet/en/). Accessed September 6, 2018.
36. Reardon JM, Harmon KJ, Schult GC, Staton CA, Waller AE. Use of diagnosis codes for detection of clinically significant opioid poisoning in the emergency department: A retrospective analysis of a surveillance case definition. *BMC Emerg Med*. 2016;16(1):11. doi:10.1186/s12873-016-0075-4
37. Green CA, Perrin NA, Hazlehurst B, et al. Identifying and classifying opioid-related overdoses: A validation study. *Pharmacoepidemiol Drug Saf*. April 2019:pds.4772. doi:10.1002/pds.4772
38. Rowe C, Vittinghoff E, Santos G-M, Behar E, Turner C, Coffin PO. Performance Measures of Diagnostic Codes for Detecting Opioid Overdose in the Emergency Department. Newgard CD, ed. *Acad Emerg Med*. 2017;24(4):475-483. doi:10.1111/acem.13121
39. Centers for Disease Control and Prevention. Data Resources | Analyzing Prescription Data and Morphine Milligram Equivalents (MME). <https://www.cdc.gov/drugoverdose/resources/data.html>. Accessed January 21, 2020.
40. World Health Organization. WHOCC - Definition and general considerations. [https://www.whooc.no/ddd/definition\\_and\\_general\\_considera/](https://www.whooc.no/ddd/definition_and_general_considera/). Published 2018. Accessed January 21, 2020.
41. Saunders KW, Von Korff M, Campbell CI, et al. Concurrent use of alcohol and sedatives among persons prescribed chronic opioid therapy: prevalence and risk factors. *J Pain*. 2012;13(3):266-275. doi:10.1016/j.jpain.2011.11.004
42. Park TW, Saitz R, Ganoczy D, Ilgen MA, Bohnert ASB. Benzodiazepine prescribing patterns and deaths from drug overdose among US veterans receiving opioid analgesics: case-cohort study. *BMJ*. 2015;350:h2698. doi:10.1136/BMJ.H2698
43. Ferries EA, Gilson AM, Aparasu RR, Chen H, Johnson ML, Fleming ML. The Prevalence of and Factors Associated With Receiving Concurrent Controlled Substance Prescriptions. *Subst Use Misuse*. 2017;52(12):1639-1645. doi:10.1080/10826084.2017.1298617
44. Young SG, Hayes CJ, Aram J, Tait MA. Doctor hopping and doctor shopping for prescription opioids associated with increased odds of high-risk use. *Pharmacoepidemiol Drug Saf*. 2019;(October 2018):1117-1124. doi:10.1002/pds.4838
45. Ranapurwala SI, Naumann RB, Austin AE, Dasgupta N, Marshall SW. Methodologic limitations of prescription opioid safety research and recommendations for improving the evidence base. *Pharmacoepidemiol Drug Saf*. June 2018. doi:10.1002/pds.4564
46. Mansournia MA, Etminan M, Danaei G, Kaufman JS, Collins G. Handling time varying confounding in observational research. *BMJ*. 2017;359:1-6. doi:10.1136/bmj.j4587
47. Robins J, Hernán M, Brumback B. Marginal structural models and causal inference in epidemiology. *Epidemiology*. 2000;11(5):550-560. doi:10.1039/C29690000418

- 1  
2  
3 48. Mortimer KM, Neugebauer R, Van Der Laan M, Tager IB. An application of model-  
4 fitting procedures for marginal structural models. *Am J Epidemiol*. 2005;162(4):382-388.  
5 doi:10.1093/aje/kwi208  
6  
7 49. Gudin JA, Mogali S, Jones JD, Comer SD. Risks, Management, and Monitoring of  
8 Combination Opioid, Benzodiazepines, and/or Alcohol Use. *Postgrad Med*.  
9 2013;125(4):115-130. doi:10.3810/pgm.2013.07.2684  
10  
11 50. Langan SM, Schmidt SA, Wing K, et al. The reporting of studies conducted using  
12 observational routinely collected health data statement for pharmacoepidemiology  
13 (RECORD-PE). *BMJ*. 2018;363. doi:10.1136/bmj.k3532  
14  
15  
16  
17  
18  
19  
20  
21  
22  
23  
24  
25  
26  
27  
28  
29  
30  
31  
32  
33  
34  
35  
36  
37  
38  
39  
40  
41  
42  
43  
44  
45  
46  
47  
48  
49  
50  
51  
52  
53  
54  
55  
56  
57  
58  
59  
60

Table 1: Confounders under study

| Covariate                          | Measured at baseline only                                                                                                                                                                                                                                                                                                                                                                    |
|------------------------------------|----------------------------------------------------------------------------------------------------------------------------------------------------------------------------------------------------------------------------------------------------------------------------------------------------------------------------------------------------------------------------------------------|
| Age                                | 18-45, 46-64, >64                                                                                                                                                                                                                                                                                                                                                                            |
| Sex                                | Male or Female                                                                                                                                                                                                                                                                                                                                                                               |
| Neighborhood income quintile       | Q1-Q5; Calculated using results from the 2016 Canadian Census                                                                                                                                                                                                                                                                                                                                |
| Drug insurance type                | Those who require social assistance vs all other. A measure of social deprivation.                                                                                                                                                                                                                                                                                                           |
| History of opioid poisoning        | Ever/never hospital or emergency department visit for an opioid poisoning in previous year. These are patients who experienced an overdose from non-prescription sources of opioids, or from opioids dispensed > 1 year before cohort entry.                                                                                                                                                 |
|                                    | <b>Measured at baseline and every 30 days during follow-up</b>                                                                                                                                                                                                                                                                                                                               |
| Mental health diagnoses            | Diagnoses for depression, anxiety disorders, personality disorders, mood disorders, schizophrenic and psychotic disorders, and all other mental health disorders                                                                                                                                                                                                                             |
| Mental health medications          | Dispensations for anti-depressants, anti-psychotics, and mood stabilizing drugs                                                                                                                                                                                                                                                                                                              |
| Opioid abuse/dependence diagnoses  | Diagnoses for opioid abuse, opioid dependence, or mental/behavioural disorders due to opioid use                                                                                                                                                                                                                                                                                             |
| Opioid use disorder medications    | Dispensations for methadone or buprenorphine                                                                                                                                                                                                                                                                                                                                                 |
| Non-opioid substance use disorders | Diagnoses for alcohol and nicotine dependence/abuse.                                                                                                                                                                                                                                                                                                                                         |
| Substance use disorder treatments  | Dispensations for nicotine or alcohol dependence medication                                                                                                                                                                                                                                                                                                                                  |
| Drug seeking behaviour             | Number of unique opioid prescribers and pharmacies used in given time period                                                                                                                                                                                                                                                                                                                 |
| Muscle relaxant or z-drug use      | Ever/never use. These are non-benzodiazepine sedatives that could also potentiate the effect of opioids.                                                                                                                                                                                                                                                                                     |
| Comorbidities                      | Diagnoses for myocardial infarction, congestive heart failure, peripheral vascular disease, cerebrovascular disease, dementia, chronic pulmonary disease, rheumatologic disease, peptic ulcer disease, mild liver disease, diabetes (with or without complications), hemiplegia or paraplegia, renal disease, cancer, moderate or severe liver disease, metastatic solid tumour or AIDS/HIV. |

Figure 1: Examples of opioid and benzodiazepine utilization patterns to illustrate how exposure will be assigned

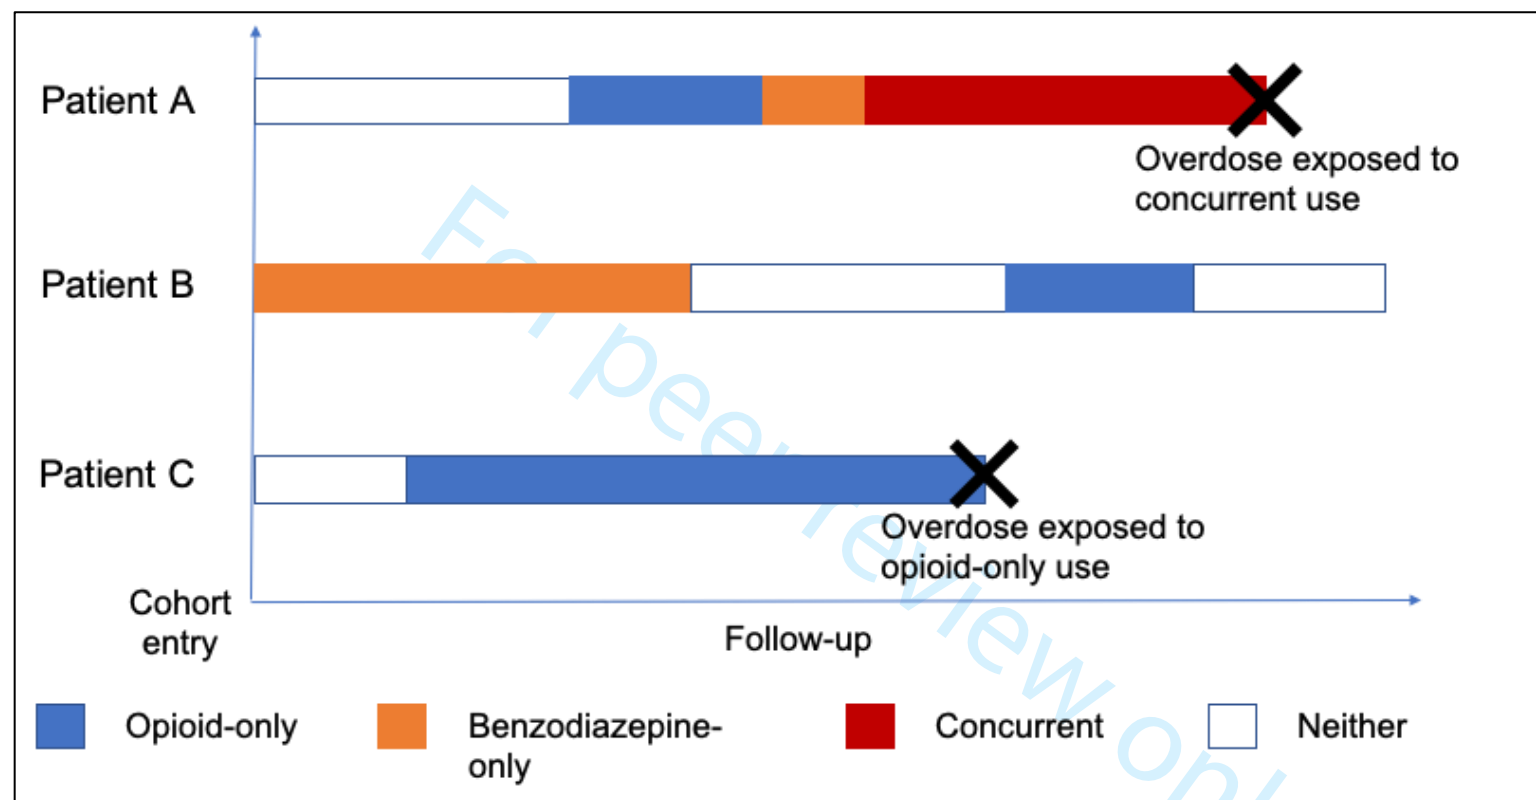

The purpose of this figure is to show how exposure will be assigned using three fictitious patients to illustrate. **Patient (A)** enters the cohort with no opioid and benzodiazepine use as shown by the section in white. Then, they receive their opioid prescription (blue), which ends right before they begin their benzodiazepine prescription (orange). During their period of benzodiazepine use, however, they receive another opioid prescription that overlaps this benzodiazepine period (red). Since they were using both drugs the day before an overdose, this patient's event would be exposed to concurrent drug use. **Patient (B)** enters our study already using benzodiazepines (orange), then stops for a period of time (white) before receiving a short prescription for opioids (blue) and then continues their period of non-use (white). **Patient (C)** enters the study using neither drug (white), but then begins a long duration of opioid-only use (blue) before experiencing the event. Since they were exposed to opioids only in the day before overdose, their event would be considered unexposed to concurrent drug use.

## APPENDIX I

Table E1: ICD-9 and ICD-10 codes included in outcome definition

| Opioid poisoning           | Code  | Description                                                                                                             |
|----------------------------|-------|-------------------------------------------------------------------------------------------------------------------------|
|                            | E8500 | Accidental poisoning by heroin                                                                                          |
|                            | E8501 | Accidental poisoning by methadone                                                                                       |
|                            | E8502 | Accidental poisoning by other opiates and related narcotics                                                             |
|                            | 96500 | Poisoning by opium (alkaloids) unspecified                                                                              |
|                            | 96501 | Poisoning by heroin                                                                                                     |
|                            | 96502 | Poisoning by methadone                                                                                                  |
|                            | 96509 | Poisoning by other opiates and related narcotics                                                                        |
|                            | T400  | Poisoning by opium                                                                                                      |
|                            | T401  | Poisoning by heroin                                                                                                     |
|                            | T402  | Poisoning by other opioids                                                                                              |
|                            | T403  | Poisoning by methadone                                                                                                  |
|                            | T404  | Poisoning by other synthetic narcotic                                                                                   |
|                            | T406  | Poisoning by other and unspecified narcotics                                                                            |
|                            | X42   | Accidental poisoning by and exposure to narcotics and psychodysleptics [hallucinogens], not elsewhere classified        |
| Adverse effects of opioids | E9350 | Heroin causing adverse effects in therapeutic use                                                                       |
|                            | E9351 | Methadone causing adverse effects in therapeutic use                                                                    |
|                            | E9352 | Other opiates and related narcotics causing adverse effects in therapeutic use                                          |
|                            | Y450  | Drugs, medicaments and biological substances causing adverse effects in therapeutic use: Opioids and related analgesics |

\*The first occurrence of any one code will define presence of the event

Table E2: Prescription opioids and benzodiazepines under study

| Opioid type            | ATC codes                                   |
|------------------------|---------------------------------------------|
| ANILERIDINE            | N01AH05                                     |
| BUPRENORPHINE          | N02AE01, N07BC51                            |
| BUTORPHANOL            | N02AF01                                     |
| CODEINE                | N02AA59, N02AA79, N02AJ06, N02BE51, R05DA04 |
| FENTANYL               | N01AH01, N02AB03                            |
| HYDROCODONE            | R05DA03                                     |
| HYDROMORPHONE          | N02AA03                                     |
| MEPERIDINE / PETHIDINE | N02AB02                                     |
| METHADONE              | N07BC02                                     |
| MORPHINE               | N02AA01                                     |
| OPIUM                  | N02AA02                                     |
| OXYCODONE              | N02AA05, N02AA55, N02AJ17                   |
| PENTAZOCINE            | N02AD01                                     |

|                            |                  |
|----------------------------|------------------|
| TAPENTADOL                 | N02AX06          |
| TRAMADOL                   | N02AJ13, N02AX02 |
| <b>Benzodiazepine type</b> | <b>ATC codes</b> |
| ALPRAZOLAM                 | N05BA12          |
| BROMAZEPAM                 | N05BA08          |
| CHLORDIAZEPOXIDE           | N05BA02          |
| CLOBAZAM                   | N05BA09          |
| CLONAZEPAM                 | N03AE01          |
| DIAZEPAM                   | N05BA01          |
| FLURAZEPAM                 | N05CD01          |
| LORAZEPAM                  | N05BA06          |
| MIDAZOLAM                  | N05CD08          |
| NITRAZEPAM                 | N05CD02          |
| OXAZEPAM                   | N05BA04          |
| TEMAZEPAM                  | N05CD07          |
| TRIAZOLAM                  | N05CD05          |

\*Includes combination versions of the molecule of interest

# BMJ Open

## Concurrent prescriptions for opioids and benzodiazepines and risk of opioid overdose: protocol for a retrospective cohort study using linked administrative data

|                                 |                                                                                                                                                                                                                                                                                                                                                                                                                                                                                                                                                                                                                                                                                                                                                    |
|---------------------------------|----------------------------------------------------------------------------------------------------------------------------------------------------------------------------------------------------------------------------------------------------------------------------------------------------------------------------------------------------------------------------------------------------------------------------------------------------------------------------------------------------------------------------------------------------------------------------------------------------------------------------------------------------------------------------------------------------------------------------------------------------|
| Journal:                        | <i>BMJ Open</i>                                                                                                                                                                                                                                                                                                                                                                                                                                                                                                                                                                                                                                                                                                                                    |
| Manuscript ID                   | bmjopen-2020-042299.R1                                                                                                                                                                                                                                                                                                                                                                                                                                                                                                                                                                                                                                                                                                                             |
| Article Type:                   | Protocol                                                                                                                                                                                                                                                                                                                                                                                                                                                                                                                                                                                                                                                                                                                                           |
| Date Submitted by the Author:   | 05-Nov-2020                                                                                                                                                                                                                                                                                                                                                                                                                                                                                                                                                                                                                                                                                                                                        |
| Complete List of Authors:       | Liu, Erin; McGill University, Department of Epidemiology, Biostatistics and Occupational Health; McGill University, McGill Clinical and Health Informatics<br>Tamblyn, Robyn; McGill University, Departments of Medicine and of Epidemiology, Biostatistics and Occupational Health; McGill University, McGill Clinical and Health Informatics<br>Filion, Kristian; McGill University, Departments of Medicine and of Epidemiology, Biostatistics and Occupational Health; Jewish General Hospital, Centre for Clinical Epidemiology, Lady Davis Institute<br>Buckeridge, David; McGill University, Departments of Medicine and of Epidemiology, Biostatistics, and Occupational Health; McGill University, McGill Clinical and Health Informatics |
| <b>Primary Subject Heading</b>: | Epidemiology                                                                                                                                                                                                                                                                                                                                                                                                                                                                                                                                                                                                                                                                                                                                       |
| Secondary Subject Heading:      | Pharmacology and therapeutics, Health services research                                                                                                                                                                                                                                                                                                                                                                                                                                                                                                                                                                                                                                                                                            |
| Keywords:                       | EPIDEMIOLGY, Adverse events < THERAPEUTICS, PUBLIC HEALTH                                                                                                                                                                                                                                                                                                                                                                                                                                                                                                                                                                                                                                                                                          |
|                                 |                                                                                                                                                                                                                                                                                                                                                                                                                                                                                                                                                                                                                                                                                                                                                    |

SCHOLARONE™  
Manuscripts



I, the Submitting Author has the right to grant and does grant on behalf of all authors of the Work (as defined in the below author licence), an exclusive licence and/or a non-exclusive licence for contributions from authors who are: i) UK Crown employees; ii) where BMJ has agreed a CC-BY licence shall apply, and/or iii) in accordance with the terms applicable for US Federal Government officers or employees acting as part of their official duties; on a worldwide, perpetual, irrevocable, royalty-free basis to BMJ Publishing Group Ltd ("BMJ") its licensees and where the relevant Journal is co-owned by BMJ to the co-owners of the Journal, to publish the Work in this journal and any other BMJ products and to exploit all rights, as set out in our [licence](#).

The Submitting Author accepts and understands that any supply made under these terms is made by BMJ to the Submitting Author unless you are acting as an employee on behalf of your employer or a postgraduate student of an affiliated institution which is paying any applicable article publishing charge ("APC") for Open Access articles. Where the Submitting Author wishes to make the Work available on an Open Access basis (and intends to pay the relevant APC), the terms of reuse of such Open Access shall be governed by a Creative Commons licence – details of these licences and which [Creative Commons](#) licence will apply to this Work are set out in our licence referred to above.

Other than as permitted in any relevant BMJ Author's Self Archiving Policies, I confirm this Work has not been accepted for publication elsewhere, is not being considered for publication elsewhere and does not duplicate material already published. I confirm all authors consent to publication of this Work and authorise the granting of this licence.



1  
2  
3  
4  
5  
6  
7 **Concurrent prescriptions for opioids and benzodiazepines and risk of opioid overdose:**  
8 **protocol for a retrospective cohort study using linked administrative data**  
9

10  
11  
12  
13 Erin Y. Liu,<sup>1,2</sup> Robyn Tamblyn,<sup>1,2,4</sup> Kristian B. Filion,<sup>1,3,4</sup> David L. Buckeridge<sup>1,2,4</sup>  
14  
15

16  
17  
18 Author Affiliations:  
19

20 1. Department of Epidemiology, Biostatistics and Occupational Health, McGill University,  
21 Montréal, Québec Canada  
22

23 2. McGill Clinical and Health Informatics, McGill University, Montréal, Québec, Canada  
24

25 3. Center for Clinical Epidemiology, Lady Davis Institute, Jewish General Hospital, Montréal,  
26 Québec, Canada  
27

28 4. Department of Medicine, McGill University, Montréal, Québec, Canada  
29  
30  
31  
32  
33  
34  
35  
36  
37

38 Corresponding Author

39 Erin Liu  
40 Erin.y.liu@mail.mcgill.ca  
41

42 1140 Pine Avenue West  
43 Montréal, Quebec, H3A 1A3  
44 Canada  
45  
46  
47

48 Abstract word count: 286

49 Manuscript word count: 3,995

50 References: 57

51 Tables: 1

52 Figures: 1

53 Appendix: 1

54 Keywords: opioids, benzodiazepines, concomitant/concurrent drug use, pharmacoepidemiology  
55  
56  
57  
58  
59  
60

## ABSTRACT

**Introduction:** Opioid overdoses have increased substantially over the last 20 years, with over 400,000 deaths in North America. While opioid prescribing has been a target of research, benzodiazepine and opioid co-intoxication has emerged as a potential risk factor. Our aim is to assess the risk of opioid overdose associated with concurrent use of opioids and benzodiazepines relative to opioids alone.

**Methods and analysis:** A retrospective cohort study will be conducted using medical claims data from adult residents of Montréal, Canada. We will create a cohort of new users of opioids (i.e., no opioid dispensations in prior year) in 2000-2014 from people with at least two years of continuous health insurance. Those with any diagnosis or hospitalization for cancer or palliative care in the two-years before their first opioid dispensation will be excluded. On each person-day of follow-up, exposure status will be classified into one of four mutually-exclusive categories: i) opioid-only, ii) benzodiazepine-only, iii) both opioid and benzodiazepine (concurrent use), or iv) neither. Opioid overdose will be measured using diagnostic codes documented in the hospital discharge abstract database, physician billing claims from emergency department visits, and death records. Using a marginal structural Cox proportional hazards model, we will compare the hazard of overdose during intervals of concurrent opioid and benzodiazepine use to intervals of opioid use alone, adjusted for socio-demographics, medical and psychiatric comorbidities, and substance use disorders.

**Ethics and dissemination:** This study is approved by the McGill Faculty of Medicine Institutional Review Board and the *Commission d'accès à l'information* (Québec privacy commission). Results will be relevant to clinicians, policymakers, and other researchers interested in co-prescribing practices of opioids and benzodiazepines. Study findings will be disseminated at relevant conferences and published in biomedical and epidemiological peer-reviewed journals.

## ARTICLE SUMMARY

### Strengths and Limitations of this study

- Our choice to conduct our study in new opioid users reduces the chance for selection bias because prevalent opioid users will be more tolerant of the medication.
- Other strengths in this study includes the use of a validated outcome definition and modelling exposure as time-varying, which will reduce misclassification bias.
- The use of a marginal structural Cox proportional hazards model can control both time-fixed and time-varying confounders, therefore reducing confounding bias.
- Our study in a Canadian sample can inform whether previous results are robust across different healthcare systems, types of prescribing behaviour, and drug insurance policies.
- A potential limitation is that our results may not be generalizable to all opioid users, as we are restricted to individuals insured through the public drug plan.

## INTRODUCTION

Morbidity and mortality attributable to opioid use has increased sharply in North America over the last 20 years. In the USA, deaths from drug overdose increased from 6.1 per 100,000 in 1999 to 20.7 in 2018,[1] with 446,032 of these deaths involving opioid use.[2] In Canada, hospitalizations related to opioid overdose rose by 53% from 2007 to 2017,[3] with a national rate of 15.5 per 100,000 in 2019.[4] Deaths related to opioids also remains high, with Canada's public health agency recording 1,634 deaths from January 2016 to March 2020.[5] Since harm from opioid overdoses persist, and they affect younger age groups disproportionately, these alarming trends demand effective and immediate public health actions.

Substantial research conducted in North America has focused on the role of prescription opioids in these overdoses and deaths.[6-9] Increasingly though, the co-prescribing of opioids and benzodiazepines and their potential role in causing overdose is receiving attention.[10-13] Studies in Canada and USA showed that 27.6% and 30% of opioid overdose deaths involved benzodiazepines, respectively.[14,15] This has paralleled high rates of concurrent use of both medications. A 2017 Alberta study showed that 17.6% of opioid users had overlapping dispensations with a benzodiazepine,[16] and a 2014 study using USA pharmacy claims estimated the prevalence to be 10%.[17] What is concerning is that the prevalence of concurrent use increased by 41% from 2002 to 2014, despite guidelines from both countries cautioning against combining their use.[18,19] In this context, the extent of the role of benzodiazepines in the opioid overdose epidemic demands further research.

Benzodiazepines are a class of anticonvulsant/anxiolytic medications used to treat anxiety, depression, panic disorders, insomnia, seizure disorders, alcohol dependence, and musculoskeletal pain.[20] When consumed alone, benzodiazepines do not cause respiratory depression, the main consequence of drug overdose. But animal studies have shown that the risk of respiratory depression is elevated when benzodiazepines are taken concurrently with opioids.[21] This interaction is due to the presence of receptors for both opioids (mu and delta) and benzodiazepines (GABA) in the brain region responsible for respiratory control.[22] Since benzodiazepines act on the inhibitory pathway for respiration and opioids inhibit the excitatory receptors, the activation of both pathways can reduce the respiratory drive more than the activation of either pathway alone. Whether this reduction is a consequence of an additive effect of both drugs inhibiting the respiratory system or an amplification of benzodiazepines on the effects of opioids is unknown. Nevertheless, the biological mechanism suggests greater harm from their combined use, and there is a need to understand if these effects are sufficient to cause respiratory depression at therapeutic doses.

To date, three epidemiologic studies conducted in population-based samples of adults have examined the risk of overdose associated with concurrent use of opioids and benzodiazepines. We considered other studies on concurrent use and overdose risk, but due to their use of distinct subpopulations such as veterans,[23,24] we precluded them from our literature review as their generalizability is unclear.

The three relevant studies were all retrospective analyses based in United States that used health insurance claims data. They reported effects ranging from hazard ratio (HR)=1.2 (95% CI 1.16 to 1.34; Cho et al),[25] odds ratio (OR)=2.14 (95% CI 2.05 to 2.24; Sun et al),[26] to HR=5.05 (95% CI 3.68 to 6.93; Hernandez et al),[27] when comparing concurrent opioid and benzodiazepine use to opioid use alone. However, potential methodological limitations make these results difficult to interpret. In Hernandez et al, the exclusion of cohort members based on non-benzodiazepine sedatives use after cohort entry could induce selection bias, with an

1  
2  
3 unknown effect on the point estimate if concurrent users are more, or less, likely to be dispensed  
4 these medications. A potential source of selection bias in Sun et al is restriction to prevalent  
5 opioid users, since this would limit the sample to those who tolerated their opioid medication  
6 long enough to continue its use. Bias from exposure misclassification is also a concern. In the  
7 retrospective cohort study conducted by Hernandez et al, comparing concurrent use in the 1-90  
8 days before overdose to opioid-only use in the 1 day before means concurrent users had more  
9 opportunity (up to 90 days) for opioid exposure. Longer opportunity for opioid use means  
10 concurrent users are more likely to be chronic opioid users,[16,17] which independently  
11 increases the risk for overdose. The resultant effect would be an over-estimation of the  
12 association. In Sun et al, misclassification bias from inclusion of person-years of non-opioid use  
13 in the reference group could have also overestimated the association. Periods of non-opioid use  
14 are less likely to lead to opioid overdose, which would artificially underestimate the rate of  
15 overdose in the reference group. Immortal time bias[28] due to misclassification of person-time  
16 could have manifested in the retrospective cohort study conducted by Cho et al. In their main  
17 analysis, use of a time-fixed exposure means patients who initiated opioids and later added a  
18 benzodiazepine to their opioid regimen would have their opioid-only (and, by definition, event-  
19 free) person-time misclassified as concurrent drug use. This misclassification would bias the  
20 estimate downward, under-estimating the risk.  
21  
22  
23

24 In summary, the current evidence base could be affected by important bias. As such,  
25 there remains uncertainty about the magnitude of the risk of overdose due to the concurrent use  
26 of opioids and benzodiazepines. To reduce this uncertainty, we propose a retrospective cohort  
27 study using population-based data sources.  
28

29 Prescription opioid use has more than doubled in North America from 2001 to 2013, and  
30 combined with Europe and Oceania, these three continents account for 95.7% of worldwide  
31 use.[29] Benzodiazepine use is also high in these regions, with the USA reporting 5.2% of adults  
32 filling a prescription in 2008,[30] 4.9% amongst those 45 years and older in Canada in 2002,[31]  
33 17.7% prevalence of use in France in 2012,[32] and 2.4% of Australians from 2002 to 2007.[33]  
34 Evidently, the use of prescription opioids and benzodiazepines is highly prevalent in many  
35 countries. An accurate estimate of the risk of overdose associated with their concurrent use is  
36 important for setting public health policy in this area.  
37  
38

## 39 **METHODS AND ANALYSIS**

### 40 **Data source**

41 This study will use anonymized population-based administrative data from Montréal,  
42 Québec to define our cohort and measure all study variables. The source population consists of  
43 1.4 million people representing a 25% random sample of health-insured Montréal residents  
44 sampled from January 1, 1998 to December 31, 2014. For each individual, data on their  
45 physician services and community pharmacy drug dispensations comes from the *Régie de*  
46 *l'assurance maladie du Québec* (RAMQ), the provincial health authority that reimburses all  
47 publicly-insured medical and pharmacy services. Data on hospitalizations is provided by the  
48 *Ministère de la santé et des services sociaux* (MSSS), and mortality data comes from the *Institut*  
49 *de la statistique du Québec* (ISQ). As such, we have linked information on each person's  
50 demographics, inpatient and outpatient medical services, hospitalizations, emergency department  
51 (ED) visits, and the date and causes of death from the time they were sampled until the time that  
52 an individual loses health insurance through death or emigration from province. Half of residents  
53 are also insured for prescription drugs through the RAMQ if they are welfare recipients, aged 65  
54  
55  
56  
57  
58  
59  
60

1  
2  
3 years or older, or lack other drug insurance coverage (e.g., through their employer). Thus, data  
4 on dispensed drugs in the community (including the date, chemical name, dose, and duration),  
5 the prescribing physician, and dispensing pharmacist are available for approximately 50% of  
6 Montréal residents. The data sources have been validated previously,[34] and used extensively  
7 for research.[35-38]  
8  
9

### 10 **Study population**

11 New opioid users with RAMQ drug insurance will form our study population. These are  
12 drug-insured Montréal residents aged  $\geq 18$  who started using opioids between 2000 and 2014. We  
13 chose to include new users starting on January 1, 2000 to allow a two-year lookback period for  
14 exclusion criteria. A new opioid user will be defined as a person with no opioid dispensations for  
15 at least one year before their first opioid dispensation in this interval. A new user design was  
16 chosen to reduce the chance for selection bias, as prevalent drug users are limited to those that  
17 tolerated the drug well enough to continue its use.[39] The date of their first opioid dispensation  
18 will define the cohort entry date, and opioid users will be followed from this date until the  
19 occurrence of the outcome (defined below) or censoring due to i) death, ii) cancer diagnosis, iii)  
20 palliative care admission, iv) loss of drug or health insurance, or v) end of study period  
21 (December 31, 2014). Since patients with cancer and those undergoing palliative care will have a  
22 different risk-benefit ratio when using opioids, cohort members will be excluded if they have at  
23 least one cancer or palliative-care related diagnostic code in the two years prior to cohort entry.  
24 Patients whose first opioid dispensation is methadone or buprenorphine likely have a history of  
25 illicit opioid use, as these medications are indicated for an opioid use disorder. Given that we  
26 will be adjusting for history of opioid substance abuse, these patients will remain in the study.  
27  
28  
29  
30

### 31 **Outcome**

32 An opioid overdose occurs when opioids, possibly together with other substances, cause  
33 sedation, leading to loss of consciousness and respiratory depression.[40] We chose to study  
34 events where the use of opioids alone or in combination with benzodiazepines induces  
35 respiratory depression severe enough to require medical attention. To identify these events, we  
36 will use *International Classification of Diseases* (ICD) codes for opioid poisoning (ICD-9 codes  
37 E8500-E8502, 96500-96509 and ICD-10 codes T400-T404, T4060, T4069 and X42) and acute  
38 effects of opioids (E9350-E9352 and Y450) (Table E1, Appendix I). The presence of any one of  
39 these codes in medical service claims, hospital discharge abstracts, or vital statistics data during  
40 follow-up will define an event, and follow-up will be censored on this date. We chose to use ICD  
41 codes related to opioid poisoning and acute effects of opioids because there are no codes specific  
42 to drug overdose. However, validation studies comparing opioid poisoning codes to physician  
43 chart review have found positive predictive values ranging from 70.0% to 84.6%.[41-43] As  
44 such, this outcome definition will provide a high specificity in capturing the mechanism of  
45 interest (e.g., respiratory depression caused by medication).  
46  
47  
48  
49

### 50 **Exposure**

51 To ascertain each person's opioid and benzodiazepine status, we will calculate their  
52 average daily dose using information on the drug type (Table E2, Appendix I), the date the  
53 prescription was filled, the dose, quantity dispensed, and duration of the prescription. To account  
54 for different combinations of use and non-use, we will model our exposure using a time-varying  
55 approach. On each day of follow-up, exposure status will be classified into one of four mutually-  
56  
57  
58  
59  
60

exclusive categories: i) opioid-only, ii) benzodiazepine-only, iii) both opioid and benzodiazepine (concurrent use), or iv) neither (Figure 1). Since opioid overdose is an acute event, we will consider exposure status on the day before the event as the primary etiologic window of interest.

To ensure equivalency across opioid types, we will use published conversion factors to calculate each drug's oral morphine milligram equivalent (MME).[3,44] To calculate MME, we will use the standard method of multiplying the average daily dose by its conversion factor:

$$\text{Dosage per pill in mg} \times \frac{\text{\# of pills}}{\text{Duration of prescription in days}} \times \text{MME conversion factor}$$

To standardize benzodiazepine potencies, we will use the defined daily dose (DDD) methodology as recommended by the World Health Organization Collaborating Centre for Drug Statistics Methodology (WHOCC).[45] The DDD is the “the assumed average maintenance dose per day for a drug used for its main indication in adults” and is calculated as follows:

$$\frac{\text{Total \# pills}}{\text{Duration of prescription in days}} \times \frac{\text{Dosage per pill in mg}}{\text{WHO recommended daily dose in mg}}$$

Each drug's Anatomical Therapeutic Chemical (ATC) category and route of administration has its own recommended daily dose, and values will be obtained from the WHOCC website.

### Confounders

Confounding can occur in our study if we fail to adjust for factors that differ between opioid users and concurrent users, and these factors independently affect one's risk for overdose. Opioid users additionally prescribed a benzodiazepine are often older,[17,26,46] more likely to be women,[17,23,26,46] require social assistance,[27,47] be a chronic opioid user,[16,17] have more pain conditions,[46] use more potent opioids,[46,48] use other central nervous system medications,[23,25] and are more likely to have comorbidities,[25,26] mental health,[23,25,27,46] and substance use disorders.[23,26,46] Concurrent users are also more likely to seek out multiple prescribers and pharmacies in a given time period.[27,48,49] Since these characteristics are also associated with overdose in studies on opioid prescribing patterns,[50] it is important that they are adjusted for in this study.

Across all statistical analyses, we will adjust for the following confounders (Table 1): demographic factors such as age, sex, drug insurance type and neighborhood income quintile, medical comorbidities such as history of myocardial infarction, dementia, and chronic pulmonary disease, mental health comorbidities such as diagnoses and prescriptions for anxiety, depression, and mood disorders, opioid use disorders, non-opioid substance abuse/misuse such as alcohol or nicotine dependence and measures of drug-seeking behaviour such as the number of distinct prescribers and pharmacies used in past 30 days. Receipt of concurrent muscle relaxants, gabapentinoids, or Z-drugs will also be adjusted for since these medications can also depress the respiratory system.

To ascertain confounder status, we will check for its associated diagnostic or service code(s) in the defined time period. Values of covariates will be measured in the baseline period (1-year before cohort entry), and every 30 days during follow-up. For age, sex, drug insurance type, neighborhood income quintile and history of opioid poisoning, the baseline values will remain fixed throughout follow-up. For medical comorbidities, mental health conditions, opioid

1  
2  
3 use disorder, and substance use disorders, once a patient is diagnosed, we will assume these  
4 conditions persist. All other covariate values will be updated every 30 days during follow-up.  
5

## 6 7 **Statistical analyses**

### 8 **Descriptive analysis**

9 We will first perform descriptive analyses to better understand our study participants.  
10 This will include comparing concurrent and non-concurrent users with respect to baseline  
11 covariates such as those listed in Table 1. Continuous variables will be compared using means  
12 and medians, and categorical variables using frequency distributions and proportions.  
13

### 14 **Primary analysis**

#### 15 *Time-varying confounding*

16 Time-varying confounding is a concern when both exposure and confounder values are likely  
17 to change over the study period and affect each other.[51] Given that opioids and  
18 benzodiazepines are often used intermittently, bias could occur if there are factors that both  
19 predict a change in benzodiazepine status (e.g., development of drug misuse disorders or mental  
20 health exacerbation) and independently increase the risk for overdose. The three previous  
21 epidemiological studies assessing concurrent use and risk of overdose measured confounders at  
22 baseline only.[25-27] This approach assumes, often implicitly, that comorbidities and drugs used  
23 at baseline remain the same throughout follow-up and that changes in comorbidities and  
24 concomitant drugs that occur during follow-up do not impact subsequent exposure to concurrent  
25 opioid and benzodiazepines. However, for studies with long follow-up periods and transient  
26 exposures, such as our study, this assumption will likely be violated.  
27

28 To adjust for changes in confounder status without adjusting for variables on the causal  
29 pathway, we will employ a marginal structural Cox model with inverse probability of treatment  
30 weights (IPTW).[52] These models re-weight study participants based on their inverse  
31 probability of exposure to each treatment group, conditional on past use, and all confounders.  
32

#### 33 *Logistic regression for calculation of weights*

34 To construct these weights, we will first develop a multinomial logistic regression (exposure  
35 model) for the 4 exposure categories. Given  $A$  = exposure and  $W$  = Covariates, the goal is to  
36 estimate  $P(A|W)$ , which is the predicted probability of being exposed to i) opioid-only, ii)  
37 benzodiazepine-only, iii) both opioid and benzodiazepine (concurrent use), or iv) neither, as a  
38 function of covariates. Covariates used to generate the exposure model will include all time-  
39 varying confounders listed in Table 1. These weights will be re-estimated during study follow-up  
40 using updated covariate values from the past 30 days. For values that do not change, the previous  
41 value will be carried forward. Indicator variables will be used for all categorical covariates and  
42 continuous covariates will be tested for non-linear effects using Akaike Information Criterion  
43 (AIC) to determine the optimal form. Once we convert the log odds into predicted probabilities,  
44  $P(A|W)$ , we can calculate stabilized weights  $[P(A)/P(A|W)]$ . This is achieved by dividing  $P(A)$ ,  
45 the proportion of the cohort exposed to each opioid and/or benzodiazepine category, by  $P(A|W)$ ,  
46 the predicted probability estimated from the exposure model. Use of stabilized weights is  
47 recommended because it leads to smaller variance as compared to un-stabilized weights, which  
48 are simply the inverse of  $P(A|W)$ . [52,53] This ensures that results do not depend on a few  
49 individuals with extremely large weights. Similarly, we will truncate any extreme values (e.g.  
50 99<sup>th</sup> or 95<sup>th</sup> percentiles) and verify that the mean distribution of weights is close to 1 to ensure the  
51 robustness of our weights.  
52  
53  
54  
55  
56  
57  
58  
59  
60



### *Cox proportional hazards regression to estimate effect on overdose*

The final Cox proportional hazards regression model will estimate the hazard ratio for time to first overdose event, when comparing events during concurrent opioid and benzodiazepine person-time to opioid-only person time, adjusted for baseline confounders, and weighted according to each person's vector of IPTWs. We will use bootstrapping to construct 95% confidence intervals.

### Subgroup analyses

To identify patient characteristics that may modify the opioid and benzodiazepine association with overdose, we will undertake the following secondary analyses. We will stratify the primary analysis by sex (males vs female), age ( $\geq 76$  vs 65 to 75 years among everyone on the 65+ drug insurance plan), social deprivation (drug insurance for welfare recipients vs all other), presence of an opioid use disorder or substance use disorder (ever/never), presence of a mental health condition (ever/never), and number and type of distinct opioid prescribers (e.g., surgeon, dentist or family physician). To assess differential effects by duration or potency of drug use, we will also stratify the analysis by cumulative days, and standardized dose of opioid and benzodiazepines. To address the possibility that prevalent benzodiazepine users may be less susceptible to respiratory depression due to increased tolerance, we will repeat the primary analysis restricted to those with no use of benzodiazepines at baseline.

In these secondary analyses, the stratification variables will be omitted from the multinomial regression model used to calculate IPTWs. Instead, they will be used to separate the cohort into subgroups and each subgroup will be fit with their own Cox regression model to obtain strata-specific estimates. We intend these analyses to be hypothesis generating for future researchers to identify high-risk patient groups.

### Sensitivity analyses

#### *Exposure measurement error*

To account for the biological half-lives of opioids and benzodiazepines,[54] and the fact that many patients may take their medications on an 'as needed' (or "PRN") basis, we will introduce a grace period into our exposure assessment, where an additional 7 and 30 days of drug duration will be added to the end of each prescription. This is to account for situations where some patients may dispense their drug but keep it in their medicine cabinets until it is required. Since chronic opioid users have more medication in supply, this also increases their chance for overdose if they ingest more than the recommended dose at once.

#### *Timing of exposure*

Although opioid and benzodiazepine-induced overdose is an acute effect, we will assess the 30-day period before the event date as a secondary etiological window of interest.

#### *Outcome measurement error*

Given the challenges of attributing causality in drug poisoning, we will repeat our primary analysis using the broader definition of 'any drug poisoning' to account for outcome measurement error. Additionally, we will analyze fatal and non-fatal overdoses separately, and given the potential for overdose deaths to be misclassified, we will also assess all-cause mortality as a secondary outcome.

## **STRENGTHS AND LIMITATIONS**

1  
2  
3 Our study will contribute evidence to an important public health question. Given the high  
4 prescribing rates of opioids and benzodiazepines, any risk of overdose from their concurrent use  
5 would have a large impact at a population level.

6 We believe our study has several strengths. Restricting our cohort to new opioid users  
7 reduces the chance for selection bias because prevalent opioid users will be more tolerant of the  
8 medication. Our use of a validated outcome measure will reduce misclassification bias and the  
9 sensitivity analysis using the broadened definition can test robustness of our results. By  
10 modelling use of opioids and benzodiazepines as time-varying, we will reduce exposure  
11 misclassification bias. This is particularly important since prescriptions for these two  
12 medications tend to be intermittent in nature. By employing a marginal structural Cox  
13 proportional hazards model, we can reduce bias from both time-fixed and time-varying  
14 confounders. Conducting observational studies with varied statistical techniques in diverse  
15 populations will strengthen the evidence base regarding this issue. Finally, our study in a  
16 Canadian sample can inform whether previous results are robust across different healthcare  
17 systems, types of prescribing behaviour, and drug insurance policies.

18 A limitation is that our results may not be generalizable to all opioid users, as we are  
19 restricted to individuals insured through the public drug plan. The drug plan is limited to all  
20 persons 65 years or older, those on social assistance, and those without employer-based access to  
21 drug insurance. However, given that we are measuring a biological drug effect and population-  
22 level variation in drug metabolism is unlikely to differ substantially, our results should be  
23 generalizable to most patients prescribed these medications. Another limitation is that exposure  
24 to non-prescribed sources of opioids and benzodiazepines, such as those obtained illicitly, or  
25 from friends and family, will be missing in our analysis. We believe any misclassification will be  
26 minimal, though, since our exposure contrast includes prescription opioid use in both the  
27 exposed (concurrent opioid and benzodiazepine) and reference (opioid-only) groups. Moreover,  
28 population-based surveys such as the Canadian Tobacco, Alcohol and Drugs Survey show that in  
29 2015, 2.3% of Canadians aged 15 and older reported any non-cannabis, illicit drug use in the past  
30 year, and 0.3% had abused pharmaceutical pain relievers.[55] This small percentage of illicit  
31 opioid use in the population, in addition to the fact that our study period (2000-2014) predates  
32 the rise of synthetic, illicit opioids (e.g. fentanyl) and their involvement in overdose deaths[56]  
33 means it should not impact our study findings greatly.

### 34 35 36 37 38 39 40 **PATIENT AND PUBLIC INVOLVEMENT**

41 This research was done without patient involvement. Patients were not invited to comment on  
42 the study design and were not consulted to develop patient relevant outcomes or interpret the  
43 results. Patients were not invited to contribute to the writing or editing of this document for  
44 readability or accuracy.

### 45 46 47 **ETHICS AND DISSEMINATION**

48 This study is approved by the McGill Faculty of Medicine Institutional Review Board,  
49 and the *Commission d'accès à l'information* (Québec privacy commission). Since we will be  
50 using pseudo-anonymized data, no consent is required.

51 Our findings will be important to researchers, public health, and medical communities in  
52 Canada and abroad, and this will be reflected in our dissemination plan. We plan to first present  
53 our findings at pharmacoepidemiology (e.g. the International Conference on  
54 Pharmacoepidemiology & Therapeutic Risk Management) and public health/health services  
55  
56  
57  
58  
59

1  
2  
3 conferences (e.g. the Canadian Association for Health Services and Policy Research and Public  
4 Health). We hope to elicit feedback from our scientific and clinical colleagues at these venues.  
5 As our methods are novel and other epidemiologists may benefit from learning about our  
6 experience applying these methods, we will also be submitting abstracts to the Society for  
7 Epidemiology's Annual Meeting and the Canadian Society for Epidemiology and Biostatistics  
8 conference. Our partners at the National Institute of Public Health of Québec (INSPQ) and  
9 Canadian Institutes of Health Research (CIHR)'s Drug Safety and Effectiveness Network  
10 (DSEN) will be important knowledge users. We anticipate our work will inform decisions  
11 around implementing prescription monitoring programs and guidelines on prescribing of opioids  
12 and benzodiazepines. We will reach out to our public health partners to present this work in their  
13 organizational seminars.  
14  
15

16 After integrating feedback from conference peers, we will submit our manuscript to peer-  
17 reviewed biomedical journals (e.g. BMJ, AJPM) as primary care physicians are responsible for  
18 the majority of opioid and benzodiazepine prescriptions. All publications will be reported in  
19 accordance with the REporting of studies Conducted using Observational Routinely collected  
20 health Data specific to pharmacoepidemiological research (RECORD-PE).[57]  
21  
22

### 23 **AUTHOR CONTRIBUTIONS**

24 This study was conceived by EYL and all authors contributed to the design, analysis and  
25 interpretation of the data. EYL drafted the manuscript and DLB, RT, KBF revised it critically for  
26 important intellectual content. All authors gave final approval of the version to be published and  
27 EYL will be the guarantor of the work.  
28

29 **ACKNOWLEDGEMENTS** The authors are grateful for the comments and recommendations  
30 provided by Dr. Ari Nandi, Dr. Robert Platt and Dr. Michal Abrahamowicz during their review  
31 of an earlier draft of this protocol.  
32  
33

### 34 **FUNDING STATEMENT**

35 EYL is supported by the McGill R.H Tomlinson Fellowship, the CIHR Frederick Banting and  
36 Charles Best Doctoral Award, the CIHR Drug Safety and Effectiveness Cross-Disciplinary  
37 Training Program (DSECT) award, and the *Fonds de recherche du Québec – santé* (FRQS;  
38 Quebec Foundation for Health Research) Doctoral Award. KBF is supported by a salary support  
39 award from the FRQS and a William Dawson Scholar award from McGill University. DLB is  
40 supported by a Canada Research Chair in Health Informatics and Data Science (CPP-137904).  
41 RT is supported by a CIHR Operating Grant (IOP-112675).  
42  
43  
44

### 45 **DATA STATEMENT**

46 The data sharing agreements governing use of our data restricts access to members of the  
47 research team only. However, technical information used for this study (e.g. drug and disease  
48 codes) is available and will be provided in an appendix. DOI: [include DOI for appendix here].  
49

### 50 **COMPETING INTERESTS STATEMENT**

51 The authors have no conflicts of interest relevant to this manuscript to disclose.  
52  
53

### 54 **EXCLUSIVE LICENCE**

55  
56  
57  
58  
59  
60

1  
2  
3 I, the Submitting Author has the right to grant and does grant on behalf of all authors of the  
4 Work (as defined in the below author licence), an exclusive licence and/or a non-exclusive  
5 licence for contributions from authors who are: i) UK Crown employees; ii) where BMJ has  
6 agreed a CC-BY licence shall apply, and/or iii) in accordance with the terms applicable for US  
7 Federal Government officers or employees acting as part of their official duties; on a worldwide,  
8 perpetual, irrevocable, royalty-free basis to BMJ Publishing Group Ltd (“BMJ”) its licensees and  
9 where the relevant Journal is co-owned by BMJ to the co-owners of the Journal, to publish the  
10 Work in BMJ Open and any other BMJ products and to exploit all rights, as set out in our  
11 licence.  
12  
13

14  
15 The Submitting Author accepts and understands that any supply made under these terms is made  
16 by BMJ to the Submitting Author unless you are acting as an employee on behalf of your  
17 employer or a postgraduate student of an affiliated institution which is paying any applicable  
18 article publishing charge (“APC”) for Open Access articles. Where the Submitting Author  
19 wishes to make the Work available on an Open Access basis (and intends to pay the relevant  
20 APC), the terms of reuse of such Open Access shall be governed by a Creative Commons licence  
21 – details of these licences and which Creative Commons licence will apply to this Work are set  
22 out in our licence referred to above.  
23  
24  
25  
26  
27  
28  
29  
30  
31  
32  
33  
34  
35  
36  
37  
38  
39  
40  
41  
42  
43  
44  
45  
46  
47  
48  
49  
50  
51  
52  
53  
54  
55  
56  
57  
58  
59  
60

## REFERENCES

1. Hedegaard H, Miniño AM, Warner M. Drug Overdose Deaths in the United States, 1999-2017. *NCHS Data Brief*. 2018;(329):1-8.
2. Wilson N, Kariisa M, Seth P, Smith H, Davis NL. Drug and Opioid-Involved Overdose Deaths — United States, 2017–2018. *MMWR Morb Mortal Wkly Rep*. 2020;69(11):290-297. doi:10.15585/mmwr.mm6911a4
3. Canadian Institute for Health Information. *Opioid-Related Harms in Canada*. Ottawa, Ontario; 2017. <https://www.longwoods.com/articles/images/opioid-harms-chart-book-en.pdf>. Accessed April 7, 2018.
4. Public Health Agency of Canada. Opioid-related harms in Canada - Age-adjusted rate (per 100,000 population) of total opioid-related poisoning hospitalizations by province or territory, in 2019. <https://health-infobase.canada.ca/substance-related-harms/opioids/graphs?index=2870>. Accessed October 14, 2020.
5. Public Health Agency of Canada. Opioid-related harms in Canada - Deaths (September 2020). <https://health-infobase.canada.ca/substance-related-harms/opioids/>. Accessed October 14, 2020.
6. Dasgupta N, Funk MJ, Proescholdbell S, Hirsch A, Ribisl KM, Marshall S. Cohort Study of the Impact of High-dose Opioid Analgesics on Overdose Mortality. *Pain Med*. 2015;17(1):n/a-n/a. doi:10.1111/pme.12907
7. Dunn KM, Saunders KW, Rutter CM, et al. Opioid Prescriptions for Chronic Pain and Overdose. *Ann Intern Med*. 2010;152(2):85. doi:10.7326/0003-4819-152-2-201001190-00006
8. Spooner L, Fernandes K, Martins D, et al. High-Dose Opioid Prescribing and Opioid-Related Hospitalization: A Population-Based Study. Schanzer DL, ed. *PLoS One*. 2016;11(12):e0167479. doi:10.1371/journal.pone.0167479
9. Bohnert ASB, Valenstein M, Bair MJ, et al. Association Between Opioid Prescribing Patterns and Opioid Overdose-Related Deaths. *JAMA*. 2011;305(13):1315. doi:10.1001/jama.2011.370
10. Karaca-Mandic P, Meara E, Morden NE. The growing problem of co-treatment with opioids and benzodiazepines. *BMJ*. 2017;356:j1224. doi:10.1136/bmj.j1224
11. Lembke A, Papac J, Humphreys K. Our Other Prescription Drug Problem. *N Engl J Med*. 2018;378(8):693-695. doi:10.1056/NEJMp1715050
12. Benzos might be a “hidden element” of the US’ overdose epidemic - CNN. <https://www.cnn.com/2020/01/20/health/benzodiazepines-prescriptions-study/index.html>. Accessed January 23, 2020.
13. Limandri BJ. Benzodiazepine Use: The Underbelly of the Opioid Epidemic. *J Psychosoc Nurs Ment Health Serv*. 2018;56(6):11-15. doi:10.3928/02793695-20180521-03
14. Gomes T, Khuu W, Martins D, et al. Contributions of prescribed and non-prescribed opioids to opioid related deaths: population based cohort study in Ontario, Canada. *BMJ*. 2018;362:k3207. doi:10.1136/bmj.k3207
15. Jones CM, Mack KA, Paulozzi LJ. Pharmaceutical Overdose Deaths, United States, 2010. *JAMA*. 2013;309(7):657. doi:10.1001/jama.2013.272
16. Sharma V, Weir D, Samanani S, et al. Characterisation of concurrent use of prescription opioids and benzodiazepine/Z-drugs in Alberta, Canada: A population-based study. *BMJ Open*. 2019;9(9). doi:10.1136/bmjopen-2019-030858
17. Hwang CS, Kang EM, Kornegay CJ, Staffa JA, Jones CM, McAninch JK. Trends in the

- 1  
2  
3 Concomitant Prescribing of Opioids and Benzodiazepines, 2002–2014. *Am J Prev Med*.  
4 2016;51(2):151-160. doi:10.1016/J.AMEPRE.2016.02.014
- 5 18. Dowell D, Haegerich TM, Chou R. CDC Guideline for Prescribing Opioids for Chronic  
6 Pain—United States, 2016. *JAMA*. 2016;315(15):1624. doi:10.1001/jama.2016.1464
- 7 19. Busse JW, Buckley N, Buna D, et al. The 2017 Canadian Guideline for Opioids for  
8 Chronic Non-Cancer Pain Guideline Panel Members. 2017. [http://cpspei.ca/wp-](http://cpspei.ca/wp-content/uploads/2012/01/Guideline-for-Opioids-for-Chronic-Non-Cancer-Pain-McMaster-May-2017-Approved-by-Council-June-19-2017.pdf)  
9 [content/uploads/2012/01/Guideline-for-Opioids-for-Chronic-Non-Cancer-Pain-McMaster-](http://cpspei.ca/wp-content/uploads/2012/01/Guideline-for-Opioids-for-Chronic-Non-Cancer-Pain-McMaster-May-2017-Approved-by-Council-June-19-2017.pdf)  
10 [May-2017-Approved-by-Council-June-19-2017.pdf](http://cpspei.ca/wp-content/uploads/2012/01/Guideline-for-Opioids-for-Chronic-Non-Cancer-Pain-McMaster-May-2017-Approved-by-Council-June-19-2017.pdf). Accessed April 7, 2018.
- 11 20. Koch-Weser J, Greenblatt DJ, Shader RI, Abernethy DR. Current Status of  
12 Benzodiazepines. *N Engl J Med*. 1983;309(7):410-416.  
13 doi:10.1056/NEJM198308183090705
- 14 21. Jones JD, Mogali S, Comer SD. Polydrug abuse: A review of opioid and benzodiazepine  
15 combination use. *Drug Alcohol Depend*. 2012;125(1-2):8-18.  
16 doi:10.1016/j.drugalcdep.2012.07.004
- 17 22. White JM, Irvine RJ. Mechanisms of fatal opioid overdose. *Addiction*. 1999;94(7):961-  
18 972. <http://www.ncbi.nlm.nih.gov/pubmed/10707430>. Accessed August 14, 2018.
- 19 23. Park TW, Saitz R, Ganoczy D, Ilgen MA, Bohnert ASB. Benzodiazepine prescribing  
20 patterns and deaths from drug overdose among US veterans receiving opioid analgesics:  
21 case-cohort study. *BMJ*. 2015;350:h2698. doi:10.1136/BMJ.H2698
- 22 24. Gressler LE, Martin BC, Hudson TJ, Painter JT. Relationship between concomitant  
23 benzodiazepine-opioid use and adverse outcomes among US veterans. *Pain*.  
24 2018;159(3):451-459. doi:10.1097/j.pain.0000000000001111
- 25 25. Cho J, Spence MM, Niu F, Hui RL, Gray P, Steinberg S. Risk of Overdose with Exposure  
26 to Prescription Opioids, Benzodiazepines, and Non-benzodiazepine Sedative-Hypnotics in  
27 Adults: a Retrospective Cohort Study. *J Gen Intern Med*. 2020. doi:10.1007/s11606-019-  
28 05545-y
- 29 26. Sun EC, Dixit A, Humphreys K, Darnall BD, Baker LC, Mackey S. Association between  
30 concurrent use of prescription opioids and benzodiazepines and overdose: retrospective  
31 analysis. *BMJ*. 2017;356:j760. doi:10.1136/bmj.j760
- 32 27. Hernandez I, He M, Brooks MM, Zhang Y. Exposure-Response Association Between  
33 Concurrent Opioid and Benzodiazepine Use and Risk of Opioid-Related Overdose in  
34 Medicare Part D Beneficiaries. *JAMA Netw Open*. 2018;1(2):e180919.  
35 doi:10.1001/jamanetworkopen.2018.0919
- 36 28. Suissa S. Immortal Time Bias in Pharmacoepidemiology. *Am J Epidemiol*.  
37 2008;167(4):492-499. doi:10.1093/aje/kwm324
- 38 29. Berterame S, Erthal J, Thomas J, et al. Use of and barriers to access to opioid analgesics:  
39 A worldwide, regional, and national study. *Lancet*. 2016;387(10028):1644-1656.  
40 doi:10.1016/S0140-6736(16)00161-6
- 41 30. Olfson M, King M, Schoenbaum M. Benzodiazepine use in the United States. *JAMA*  
42 *Psychiatry*. 2015;72(2):136-142. doi:10.1001/jamapsychiatry.2014.1763
- 43 31. Beck CA, Williams JVA, Wang JL, et al. Psychotropic medication use in Canada. *Can J*  
44 *Psychiatry*. 2005;50(10):605-613. doi:10.1177/070674370505001006
- 45 32. (ANSM) TNA for the S of M and HP. *Etat Des Lieux de La Consommation Des*  
46 *Benzodiazépines En France.*; 2012. [https://ansm.sante.fr/S-informer/Points-d-information-](https://ansm.sante.fr/S-informer/Points-d-information-Points-d-information/Etat-des-lieux-en-2013-de-la-consommation-des-benzodiazepines-en-France-Point-d-Information)  
47 [Points-d-information/Points-d-information/Etat-des-lieux-en-2013-de-la-consommation-des-benzodiazepines-](https://ansm.sante.fr/S-informer/Points-d-information-Points-d-information/Etat-des-lieux-en-2013-de-la-consommation-des-benzodiazepines-en-France-Point-d-Information)  
48 [en-France-Point-d-Information](https://ansm.sante.fr/S-informer/Points-d-information-Points-d-information/Etat-des-lieux-en-2013-de-la-consommation-des-benzodiazepines-en-France-Point-d-Information). Accessed June 12, 2020.
- 49  
50  
51  
52  
53  
54  
55  
56  
57  
58  
59  
60

- 1  
2  
3 33. Hollingworth SA, Siskind DJ. Anxiolytic, hypnotic and sedative medication use in  
4 Australia. *Pharmacoepidemiol Drug Saf.* 2010;19(3):280-288. doi:10.1002/pds.1899  
5  
6 34. Tamblyn R, Lavoie G, Petrella L, Monette J. The use of prescription claims databases in  
7 pharmacoepidemiological research: The accuracy and comprehensiveness of the  
8 prescription claims database in Québec. *J Clin Epidemiol.* 1995;48(8):999-1009.  
9 doi:10.1016/0895-4356(94)00234-H  
10  
11 35. Verma A, Rochefort C, Powell G, Buckeridge D. Hospital readmissions and the day of the  
12 week. *J Health Serv Res Policy.* 2018;23(1):21-27. doi:10.1177/1355819617750185  
13  
14 36. Doll MK, Quach C, Buckeridge DL. Evaluation of the Impact of a Rotavirus Vaccine  
15 Program on Pediatric Acute Gastroenteritis Hospitalizations: Estimating the Overall Effect  
16 Attributable to the Program as a Whole, and as a Per-Unit Change in Rotavirus Vaccine  
17 Coverage. *Am J Epidemiol.* May 2018. doi:10.1093/aje/kwy097  
18  
19 37. Sylvestre M-P, Abrahamowicz M, Čapek R, Tamblyn R. Assessing the cumulative effects  
20 of exposure to selected benzodiazepines on the risk of fall-related injuries in the elderly.  
21 *Int Psychogeriatrics.* 2012;24(04):577-586. doi:10.1017/S1041610211002031  
22  
23 38. Bernatsky S, Joseph L, Pineau C, Tamblyn R, Feldman D, Clarke A. A population-based  
24 assessment of systemic lupus erythematosus incidence and prevalence--results and  
25 implications of using administrative data for epidemiological studies. *Rheumatology*  
26 *(Oxford).* 2007;46(12):1814-1818. doi:10.1093/rheumatology/kem233  
27  
28 39. Danaei G, Tavakkoli M, Hernán MA. Bias in observational studies of prevalent users:  
29 Lessons for comparative effectiveness research from a meta-analysis of statins. *Am J*  
30 *Epidemiol.* 2012;175(4):250-262. doi:10.1093/aje/kwr301  
31  
32 40. World Health Organization. WHO | Information sheet on opioid overdose. *WHO.* 2018.  
33 [http://www.who.int/substance\\_abuse/information-sheet/en/](http://www.who.int/substance_abuse/information-sheet/en/). Accessed September 6, 2018.  
34  
35 41. Reardon JM, Harmon KJ, Schult GC, Staton CA, Waller AE. Use of diagnosis codes for  
36 detection of clinically significant opioid poisoning in the emergency department: A  
37 retrospective analysis of a surveillance case definition. *BMC Emerg Med.* 2016;16(1):11.  
38 doi:10.1186/s12873-016-0075-4  
39  
40 42. Green CA, Perrin NA, Hazlehurst B, et al. Identifying and classifying opioid-related  
41 overdoses: A validation study. *Pharmacoepidemiol Drug Saf.* April 2019:pds.4772.  
42 doi:10.1002/pds.4772  
43  
44 43. Rowe C, Vittinghoff E, Santos G-M, Behar E, Turner C, Coffin PO. Performance  
45 Measures of Diagnostic Codes for Detecting Opioid Overdose in the Emergency  
46 Department. Newgard CD, ed. *Acad Emerg Med.* 2017;24(4):475-483.  
47 doi:10.1111/acem.13121  
48  
49 44. Centers for Disease Control and Prevention. Data Resources | Analyzing Prescription Data  
50 and Morphine Milligram Equivalents (MME).  
51 <https://www.cdc.gov/drugoverdose/resources/data.html>. Accessed January 21, 2020.  
52  
53 45. World Health Organization. WHOCC - Definition and general considerations.  
54 [https://www.whooc.no/ddd/definition\\_and\\_general\\_considera/](https://www.whooc.no/ddd/definition_and_general_considera/). Published 2018. Accessed  
55 January 21, 2020.  
56  
57 46. Saunders KW, Von Korff M, Campbell CI, et al. Concurrent use of alcohol and sedatives  
58 among persons prescribed chronic opioid therapy: prevalence and risk factors. *J Pain.*  
59 2012;13(3):266-275. doi:10.1016/j.jpain.2011.11.004  
60  
61 47. Agarwal SD, Landon BE. Patterns in Outpatient Benzodiazepine Prescribing in the United  
62 States. *JAMA Netw Open.* 2019;2(1):e187399. doi:10.1001/jamanetworkopen.2018.7399

- 1  
2  
3 48. Ferries EA, Gilson AM, Aparasu RR, Chen H, Johnson ML, Fleming ML. The Prevalence  
4 of and Factors Associated With Receiving Concurrent Controlled Substance Prescriptions.  
5 *Subst Use Misuse*. 2017;52(12):1639-1645. doi:10.1080/10826084.2017.1298617  
6  
7 49. Young SG, Hayes CJ, Aram J, Tait MA. Doctor hopping and doctor shopping for  
8 prescription opioids associated with increased odds of high-risk use. *Pharmacoepidemiol*  
9 *Drug Saf*. 2019;(October 2018):1117-1124. doi:10.1002/pds.4838  
10  
11 50. Ranapurwala SI, Naumann RB, Austin AE, Dasgupta N, Marshall SW. Methodologic  
12 limitations of prescription opioid safety research and recommendations for improving the  
13 evidence base. *Pharmacoepidemiol Drug Saf*. June 2018. doi:10.1002/pds.4564  
14  
15 51. Mansournia MA, Etminan M, Danaei G, Kaufman JS, Collins G. Handling time varying  
16 confounding in observational research. *BMJ*. 2017;359:1-6. doi:10.1136/bmj.j4587  
17  
18 52. Robins J, Hernán M, Brumback B. Marginal structural models and causal inference in  
19 epidemiology. *Epidemiology*. 2000;11(5):550-560. doi:10.1039/C29690000418  
20  
21 53. Mortimer KM, Neugebauer R, Van Der Laan M, Tager IB. An application of model-  
22 fitting procedures for marginal structural models. *Am J Epidemiol*. 2005;162(4):382-388.  
23 doi:10.1093/aje/kwi208  
24  
25 54. Gudin JA, Mogali S, Jones JD, Comer SD. Risks, Management, and Monitoring of  
26 Combination Opioid, Benzodiazepines, and/or Alcohol Use. *Postgrad Med*.  
27 2013;125(4):115-130. doi:10.3810/pgm.2013.07.2684  
28  
29 55. Government of Canada. Canadian Tobacco Alcohol and Drugs (CTADS): 2015  
30 supplementary tables - Canada.ca. [https://www.canada.ca/en/health-](https://www.canada.ca/en/health-canada/services/canadian-tobacco-alcohol-drugs-survey/2015-supplementary-tables.html#a12)  
31 [canada/services/canadian-tobacco-alcohol-drugs-survey/2015-supplementary-](https://www.canada.ca/en/health-canada/services/canadian-tobacco-alcohol-drugs-survey/2015-supplementary-tables.html#a12)  
32 [tables.html#a12](https://www.canada.ca/en/health-canada/services/canadian-tobacco-alcohol-drugs-survey/2015-supplementary-tables.html#a12). Accessed October 20, 2020.  
33  
34 56. Centers for Disease Control and Prevention (CDC). Understanding the Epidemic | Drug  
35 Overdose | CDC Injury Center. <https://www.cdc.gov/drugoverdose/epidemic/index.html>.  
36 Accessed September 30, 2020.  
37  
38 57. Langan SM, Schmidt SA, Wing K, et al. The reporting of studies conducted using  
39 observational routinely collected health data statement for pharmacoepidemiology  
40 (RECORD-PE). *BMJ*. 2018;363. doi:10.1136/bmj.k3532  
41  
42  
43  
44  
45  
46  
47  
48  
49  
50  
51  
52  
53  
54  
55  
56  
57  
58  
59  
60



Table 1: Confounders under study

| Covariate                                     | Measured at baseline only                                                                                                                                                                                                                                                                                                                                                                    |
|-----------------------------------------------|----------------------------------------------------------------------------------------------------------------------------------------------------------------------------------------------------------------------------------------------------------------------------------------------------------------------------------------------------------------------------------------------|
| Age                                           | 18-45, 46-64, >64                                                                                                                                                                                                                                                                                                                                                                            |
| Sex                                           | Male or Female                                                                                                                                                                                                                                                                                                                                                                               |
| Neighborhood income quintile                  | Calculated using results from the 2011 National Household Survey and 2011 Canadian Census                                                                                                                                                                                                                                                                                                    |
| Drug insurance type                           | Those who require social assistance vs all other. A measure of social deprivation.                                                                                                                                                                                                                                                                                                           |
| History of opioid poisoning                   | Ever/never hospital or emergency department visit for an opioid poisoning or acute effect of opioid in previous year. These are patients who experienced an overdose from non-prescription sources of opioids, or from opioids dispensed > 1 year before cohort entry.                                                                                                                       |
|                                               | <b>Measured at baseline and every 30 days during follow-up</b>                                                                                                                                                                                                                                                                                                                               |
| Mental health diagnoses                       | Diagnoses for depression, anxiety disorders, personality disorders, mood disorders, schizophrenic and psychotic disorders, and all other mental health disorders                                                                                                                                                                                                                             |
| Mental health medications                     | Dispensations for anti-depressants, anti-psychotics, and mood stabilizing drugs                                                                                                                                                                                                                                                                                                              |
| Opioid abuse/dependence diagnoses             | Diagnoses for opioid abuse, opioid dependence, or mental/behavioural disorders due to opioid use                                                                                                                                                                                                                                                                                             |
| Opioid use disorder medications               | Dispensations for methadone or buprenorphine                                                                                                                                                                                                                                                                                                                                                 |
| Non-opioid substance use disorders            | Diagnoses for alcohol and nicotine dependence/abuse.                                                                                                                                                                                                                                                                                                                                         |
| Substance use disorder treatments             | Dispensations for nicotine or alcohol dependence medication                                                                                                                                                                                                                                                                                                                                  |
| Drug seeking behaviour                        | Number of unique opioid prescribers and pharmacies used in given time period                                                                                                                                                                                                                                                                                                                 |
| Muscle relaxant, gabapentinoid, or z-drug use | Ever/never use. These are non-benzodiazepine sedatives that could also potentiate the effect of opioids.                                                                                                                                                                                                                                                                                     |
| Comorbidities                                 | Diagnoses for myocardial infarction, congestive heart failure, peripheral vascular disease, cerebrovascular disease, dementia, chronic pulmonary disease, rheumatologic disease, peptic ulcer disease, mild liver disease, diabetes (with or without complications), hemiplegia or paraplegia, renal disease, cancer, moderate or severe liver disease, metastatic solid tumour or AIDS/HIV. |

1  
2  
3  
4  
5  
6  
7  
8  
9  
10  
11  
12  
13  
14  
15  
16  
17  
18  
19  
20  
21  
22  
23  
24  
25  
26  
27  
28  
29  
30  
31  
32  
33  
34  
35  
36  
37  
38  
39  
40  
41  
42  
43  
44  
45  
46  
47  
48  
49  
50  
51  
52  
53  
54  
55  
56  
57  
58  
59  
60

### Figure 1 caption

The purpose of this figure is to show how exposure will be assigned using three fictitious patients to illustrate. **Patient (A)** enters the cohort with no opioid and benzodiazepine use as shown by the section in white. Then, they receive their opioid prescription (blue), which ends right before they begin their benzodiazepine prescription (orange). During their period of benzodiazepine use, however, they receive another opioid prescription that overlaps this benzodiazepine period (red). Since they were using both drugs the day before an overdose, this patient's event would be exposed to concurrent drug use. **Patient (B)** enters our study already using benzodiazepines (orange), then stops for a period of time (white) before receiving a short prescription for opioids (blue) and then continues their period of non-use (white). **Patient (C)** enters the study using neither drug (white), but then begins a long duration of opioid-only use (blue) before experiencing the event. Since they were exposed to opioids only in the day before overdose, their event would be considered unexposed to concurrent drug use.

For peer review only

Figure 1: Opioid and benzodiazepine utilization patterns to illustrate how exposure will be assigned

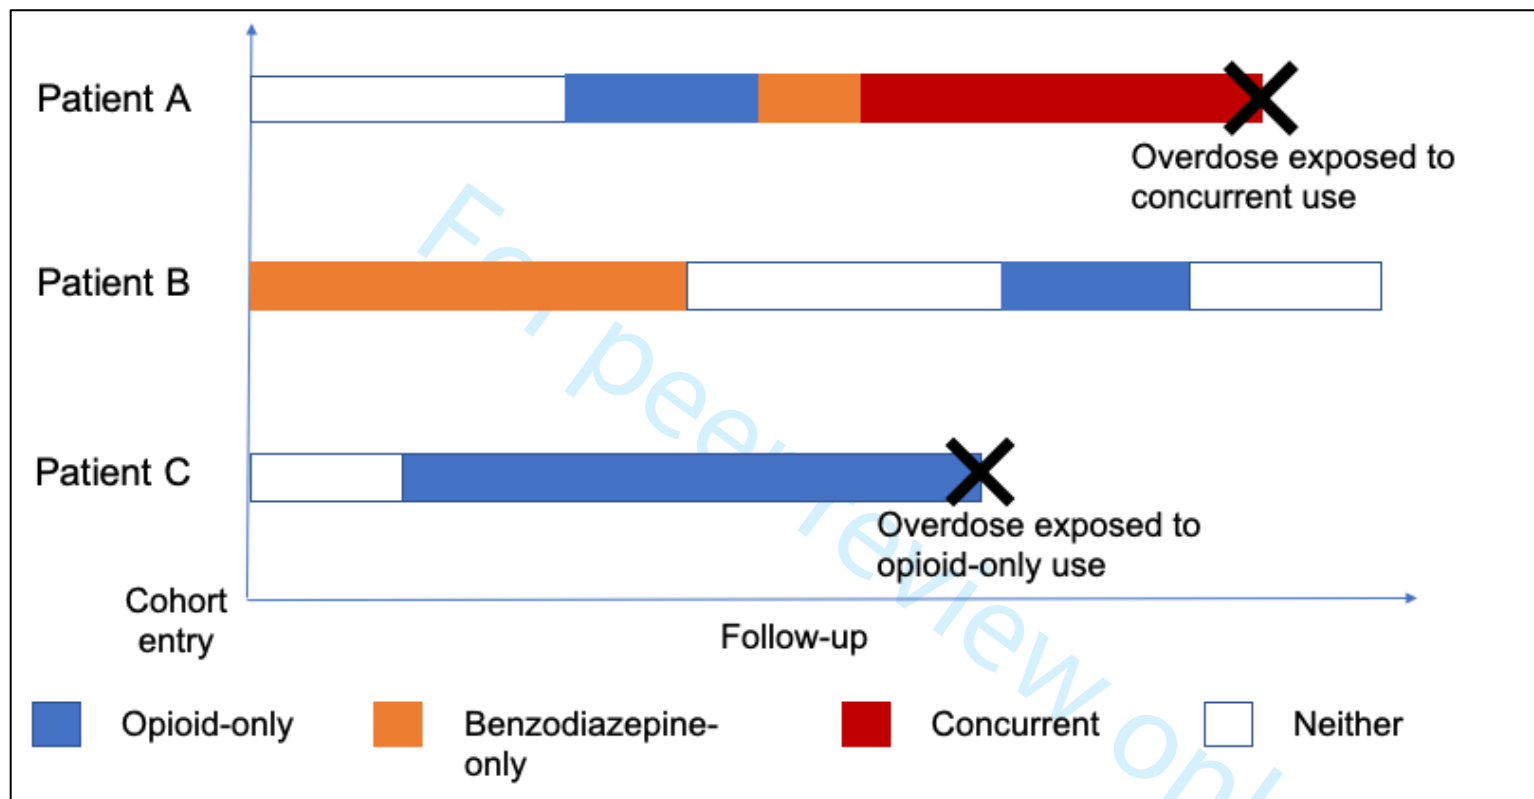

## APPENDIX I

Table E1: ICD-9 and ICD-10 codes included in outcome definition

| Opioid poisoning           | Code  | Description                                                                                                             |
|----------------------------|-------|-------------------------------------------------------------------------------------------------------------------------|
|                            | E8500 | Accidental poisoning by heroin                                                                                          |
|                            | E8501 | Accidental poisoning by methadone                                                                                       |
|                            | E8502 | Accidental poisoning by other opiates and related narcotics                                                             |
|                            | 96500 | Poisoning by opium (alkaloids) unspecified                                                                              |
|                            | 96501 | Poisoning by heroin                                                                                                     |
|                            | 96502 | Poisoning by methadone                                                                                                  |
|                            | 96509 | Poisoning by other opiates and related narcotics                                                                        |
|                            | T400  | Poisoning by opium                                                                                                      |
|                            | T401  | Poisoning by heroin                                                                                                     |
|                            | T402  | Poisoning by other opioids                                                                                              |
|                            | T403  | Poisoning by methadone                                                                                                  |
|                            | T404  | Poisoning by other synthetic narcotic                                                                                   |
|                            | T406  | Poisoning by other and unspecified narcotics                                                                            |
|                            | X42   | Accidental poisoning by and exposure to narcotics and psychodysleptics [hallucinogens], not elsewhere classified        |
| Adverse effects of opioids | E9350 | Heroin causing adverse effects in therapeutic use                                                                       |
|                            | E9351 | Methadone causing adverse effects in therapeutic use                                                                    |
|                            | E9352 | Other opiates and related narcotics causing adverse effects in therapeutic use                                          |
|                            | Y450  | Drugs, medicaments and biological substances causing adverse effects in therapeutic use: Opioids and related analgesics |

\*The first occurrence of any one code will define presence of the event

Table E2: Prescription opioids and benzodiazepines under study

| Opioid type            | ATC codes                                   |
|------------------------|---------------------------------------------|
| ANILERIDINE            | N01AH05                                     |
| BUPRENORPHINE          | N02AE01, N07BC51                            |
| BUTORPHANOL            | N02AF01                                     |
| CODEINE                | N02AA59, N02AA79, N02AJ06, N02BE51, R05DA04 |
| FENTANYL               | N01AH01, N02AB03                            |
| HYDROCODONE            | R05DA03                                     |
| HYDROMORPHONE          | N02AA03                                     |
| MEPERIDINE / PETHIDINE | N02AB02                                     |
| METHADONE              | N07BC02                                     |
| MORPHINE               | N02AA01                                     |
| OPIUM                  | N02AA02                                     |
| OXYCODONE              | N02AA05, N02AA55, N02AJ17                   |
| PENTAZOCINE            | N02AD01                                     |

|                            |                  |
|----------------------------|------------------|
| TAPENTADOL                 | N02AX06          |
| TRAMADOL                   | N02AJ13, N02AX02 |
| <b>Benzodiazepine type</b> | <b>ATC codes</b> |
| ALPRAZOLAM                 | N05BA12          |
| BROMAZEPAM                 | N05BA08          |
| CHLORDIAZEPOXIDE           | N05BA02          |
| CLOBAZAM                   | N05BA09          |
| CLONAZEPAM                 | N03AE01          |
| DIAZEPAM                   | N05BA01          |
| FLURAZEPAM                 | N05CD01          |
| LORAZEPAM                  | N05BA06          |
| MIDAZOLAM                  | N05CD08          |
| NITRAZEPAM                 | N05CD02          |
| OXAZEPAM                   | N05BA04          |
| TEMAZEPAM                  | N05CD07          |
| TRIAZOLAM                  | N05CD05          |

\*Includes combination versions of the molecule of interest
