# Supplementary material for: Concurrent prescriptions for opioids and benzodiazepines and risk of opioid overdose: protocol for a retrospective cohort study using linked administrative data
Source: PubMed Central journal article supplement — BMJ Open. 2021 Feb 18;11(2):e042299. doi: 10.1136/bmjopen-2020-042299 (PMC7896580; doi:10.1136/bmjopen-2020-042299), 2021-02-18
Supplement: bmjopen-2020-042299supp001.pdf [file bmjopen-2020-042299supp001.pdf]

## APPENDIX I

Table E1: ICD-9 and ICD-10 codes included in outcome definition

| <b>Opioid poisoning</b>           | <b>Code</b> | <b>Description</b>                                                                                                      |
|-----------------------------------|-------------|-------------------------------------------------------------------------------------------------------------------------|
|                                   | E8500       | Accidental poisoning by heroin                                                                                          |
|                                   | E8501       | Accidental poisoning by methadone                                                                                       |
|                                   | E8502       | Accidental poisoning by other opiates and related narcotics                                                             |
|                                   | 96500       | Poisoning by opium (alkaloids) unspecified                                                                              |
|                                   | 96501       | Poisoning by heroin                                                                                                     |
|                                   | 96502       | Poisoning by methadone                                                                                                  |
|                                   | 96509       | Poisoning by other opiates and related narcotics                                                                        |
|                                   | T400        | Poisoning by opium                                                                                                      |
|                                   | T401        | Poisoning by heroin                                                                                                     |
|                                   | T402        | Poisoning by other opioids                                                                                              |
|                                   | T403        | Poisoning by methadone                                                                                                  |
|                                   | T404        | Poisoning by other synthetic narcotic                                                                                   |
|                                   | T406        | Poisoning by other and unspecified narcotics                                                                            |
|                                   | X42         | Accidental poisoning by and exposure to narcotics and psychodysleptics [hallucinogens], not elsewhere classified        |
| <b>Adverse effects of opioids</b> | E9350       | Heroin causing adverse effects in therapeutic use                                                                       |
|                                   | E9351       | Methadone causing adverse effects in therapeutic use                                                                    |
|                                   | E9352       | Other opiates and related narcotics causing adverse effects in therapeutic use                                          |
|                                   | Y450        | Drugs, medicaments and biological substances causing adverse effects in therapeutic use: Opioids and related analgesics |

\*The first occurrence of any one code will define presence of the event

Table E2: Prescription opioids and benzodiazepines under study

| <b>Opioid type</b>     | <b>ATC codes</b>                            |
|------------------------|---------------------------------------------|
| ANILERIDINE            | N01AH05                                     |
| BUPRENORPHINE          | N02AE01, N07BC51                            |
| BUTORPHANOL            | N02AF01                                     |
| CODEINE                | N02AA59, N02AA79, N02AJ06, N02BE51, R05DA04 |
| FENTANYL               | N01AH01, N02AB03                            |
| HYDROCODONE            | R05DA03                                     |
| HYDROMORPHINE          | N02AA03                                     |
| MEPERIDINE / PETHIDINE | N02AB02                                     |
| METHADONE              | N07BC02                                     |
| MORPHINE               | N02AA01                                     |
| OPIUM                  | N02AA02                                     |
| OXYCODONE              | N02AA05, N02AA55, N02AJ17                   |
| PENTAZOCINE            | N02AD01                                     |

|                            |                  |
|----------------------------|------------------|
| TAPENTADOL                 | N02AX06          |
| TRAMADOL                   | N02AJ13, N02AX02 |
| <b>Benzodiazepine type</b> | <b>ATC codes</b> |
| ALPRAZOLAM                 | N05BA12          |
| BROMAZEPAM                 | N05BA08          |
| CHLORDIAZEPOXIDE           | N05BA02          |
| CLOBAZAM                   | N05BA09          |
| CLONAZEPAM                 | N03AE01          |
| DIAZEPAM                   | N05BA01          |
| FLURAZEPAM                 | N05CD01          |
| LORAZEPAM                  | N05BA06          |
| MIDAZOLAM                  | N05CD08          |
| NITRAZEPAM                 | N05CD02          |
| OXAZEPAM                   | N05BA04          |
| TEMAZEPAM                  | N05CD07          |
| TRIAZOLAM                  | N05CD05          |

\*Includes combination versions of the molecule of interest
